# Supplementary material for: Composition and environmental interpretation of the weed communities in the main planting base of jujube (Ziziphus jujuba Mill. cv. ‘LingwuChangzao’), Ningxia province of China
Source: PeerJ. 2022 Jun 17;10:e13583. doi: 10.7717/peerj.13583 (PMC9208373; doi:10.7717/peerj.13583)
Supplement: Supplemental Information 1 [file peerj-10-13583-s001.xlsx]

## Sheet: Species
	1	2	3	4	5	6	7	8	9	10	11	12	13	14	15	16	17	18	19	20	21	22	23	24	25	26	27	28	29	30	31	32	33	34	35	36	37
1	0.43	0.35	0.06	0.11	0.05	0	0	0	0	0	0	0	0	0	0	0	0	0	0	0	0	0	0	0	0	0	0	0	0	0	0	0	0	0	0	0	0
2	0.16	0.58	0	0	0	0.06	0.1	0.03	0.06	0	0	0	0	0	0	0	0	0	0	0	0	0	0	0	0	0	0	0	0	0	0	0	0	0	0	0	0
3	0.28	0.47	0	0	0	0	0	0	0	0.12	0.13	0	0	0	0	0	0	0	0	0	0	0	0	0	0	0	0	0	0	0	0	0	0	0	0	0	0
4	0	0.64	0	0	0	0	0.08	0	0.06	0	0.1	0.12	0	0	0	0	0	0	0	0	0	0	0	0	0	0	0	0	0	0	0	0	0	0	0	0	0
5	0.34	0.36	0.07	0	0	0	0	0	0	0.12	0.11	0	0	0	0	0	0	0	0	0	0	0	0	0	0	0	0	0	0	0	0	0	0	0	0	0	0
6	0.18	0.45	0	0	0	0.1	0	0	0	0.07	0	0	0.15	0.06	0	0	0	0	0	0	0	0	0	0	0	0	0	0	0	0	0	0	0	0	0	0	0
7	0	0.49	0	0	0	0.13	0	0	0	0	0	0	0.12	0	0.11	0.14	0	0	0	0	0	0	0	0	0	0	0	0	0	0	0	0	0	0	0	0	0
8	0	0.33	0.13	0	0.08	0	0	0	0	0	0	0	0.2	0.11	0.15	0	0	0	0	0	0	0	0	0	0	0	0	0	0	0	0	0	0	0	0	0	0
9	0.12	0.51	0.11	0	0	0	0	0	0.18	0	0	0	0.08	0	0	0	0	0	0	0	0	0	0	0	0	0	0	0	0	0	0	0	0	0	0	0	0
10	0.11	0.44	0	0	0	0.11	0	0	0.2	0	0	0	0.14	0	0	0	0	0	0	0	0	0	0	0	0	0	0	0	0	0	0	0	0	0	0	0	0
11	0.56	0	0	0	0	0	0	0	0	0	0	0	0.1	0	0	0	0.08	0.06	0.09	0.11	0	0	0	0	0	0	0	0	0	0	0	0	0	0	0	0	0
12	0	0	0.09	0	0	0.08	0	0	0	0	0	0.5	0	0	0.08	0	0	0	0.08	0	0.17	0	0	0	0	0	0	0	0	0	0	0	0	0	0	0	0
13	0	0	0.28	0	0	0	0.14	0	0.4	0	0	0	0	0	0	0	0	0	0	0	0	0.14	0.05	0	0	0	0	0	0	0	0	0	0	0	0	0	0
14	0.51	0	0	0	0	0	0.14	0	0.19	0	0	0	0	0	0	0	0	0	0	0	0	0.08	0.08	0	0	0	0	0	0	0	0	0	0	0	0	0	0
15	0.13	0	0.18	0	0	0	0	0	0	0	0	0.03	0	0	0	0	0	0	0.26	0.11	0.29	0	0	0	0	0	0	0	0	0	0	0	0	0	0	0	0
16	0.3	0	0	0	0	0	0	0.4	0	0	0	0	0	0	0	0	0	0	0	0	0	0	0	0.04	0.12	0.14	0	0	0	0	0	0	0	0	0	0	0
17	0.52	0	0	0	0	0	0.15	0.19	0	0	0	0	0	0	0	0	0	0	0	0	0	0	0	0	0	0	0.04	0.1	0	0	0	0	0	0	0	0	0
18	0.44	0	0	0	0	0	0	0.26	0	0	0	0	0	0.08	0	0	0	0	0	0	0	0	0	0	0	0	0	0	0.21	0	0	0	0	0	0	0	0
19	0.19	0.07	0	0	0	0	0	0.52	0	0	0	0	0	0	0	0	0	0.22	0	0	0	0	0	0	0	0	0	0	0	0	0	0	0	0	0	0	0
20	0.34	0	0	0	0	0	0	0	0	0	0	0	0	0.07	0	0	0	0	0	0	0	0	0	0	0	0	0	0.11	0	0.32	0.15	0	0	0	0	0	0
21	0	0	0	0	0	0	0	0	0	0.13	0	0	0.28	0	0	0	0	0	0.13	0.32	0	0	0	0	0	0	0	0	0	0	0	0.14	0	0	0	0	0
22	0	0	0	0	0	0.36	0	0	0	0	0	0	0	0	0.15	0	0	0	0	0.39	0	0.1	0	0	0	0	0	0	0	0	0	0	0	0	0	0	0
23	0	0	0	0	0	0.39	0	0	0.06	0	0	0	0.21	0	0.13	0	0	0	0	0.2	0	0	0	0	0	0	0	0	0	0	0	0	0	0	0	0	0
24	0	0	0	0	0.12	0.2	0	0	0	0	0	0	0.24	0	0.12	0	0	0	0	0.18	0	0	0	0	0	0	0	0	0.13	0	0	0	0	0	0	0	0
25	0	0	0	0.06	0	0	0	0	0	0	0	0	0.24	0	0	0.17	0	0	0	0.3	0	0.14	0.09	0	0	0	0	0	0	0	0	0	0	0	0	0	0
26	0.07	0	0	0	0	0	0	0.52	0	0	0	0	0	0	0	0.13	0.13	0	0	0	0	0.1	0	0	0	0	0	0	0	0	0	0	0.06	0	0	0	0
27	0	0	0.16	0	0	0	0	0.21	0	0	0	0	0.3	0	0	0	0	0	0	0	0	0	0	0	0.17	0	0	0	0	0.15	0	0	0	0	0	0	0
28	0	0	0	0	0	0.44	0	0.22	0	0	0	0	0.1	0	0	0	0	0	0	0	0	0	0.14	0	0	0	0	0	0	0	0	0	0	0.09	0	0	0
29	0.23	0	0	0	0	0.25	0	0	0.27	0	0	0	0	0	0	0	0	0	0	0	0	0	0	0	0	0	0	0	0	0	0	0	0	0	0.12	0.12	0
30	0	0	0	0	0	0.45	0	0	0	0	0	0	0.29	0	0	0	0	0	0	0	0	0	0	0	0	0	0	0	0	0.09	0	0	0	0.17	0	0	0
31	0.22	0	0	0	0	0	0	0.29	0	0	0	0	0.23	0	0	0	0.17	0	0.09	0	0	0	0	0	0	0	0	0	0	0	0	0	0	0	0	0	0
32	0	0	0.15	0	0	0	0.12	0	0.54	0	0	0	0	0	0	0	0	0	0	0.19	0	0	0	0	0	0	0	0	0	0	0	0	0	0	0	0	0
33	0.21	0	0	0	0	0	0.13	0.47	0	0	0	0	0	0	0.09	0	0	0	0	0	0	0.09	0	0	0	0	0	0	0	0	0	0	0	0	0	0	0
34	0.39	0	0	0	0.09	0	0	0.15	0	0	0	0	0	0	0	0	0.31	0	0	0	0	0	0	0	0.06	0	0	0	0	0	0	0	0	0	0	0	0
35	0	0	0	0	0	0.13	0	0.55	0	0	0	0	0	0	0	0	0	0	0	0.16	0	0	0	0	0	0	0	0	0	0	0	0.1	0.05	0	0	0	0
36	0.21	0	0	0	0	0	0	0.29	0	0	0	0	0.06	0	0	0	0	0	0	0	0.14	0	0	0	0	0	0	0	0	0.23	0	0	0	0	0	0	0.06
37	0.2	0	0	0	0	0	0	0.22	0	0.15	0	0	0.39	0	0	0	0	0	0	0	0	0	0	0.04	0	0	0	0	0	0	0	0	0	0	0	0	0
38	0.42	0	0	0	0	0	0	0	0.19	0	0	0	0.16	0	0	0	0	0	0	0	0	0	0	0	0	0	0	0	0	0.23	0	0	0	0	0	0	0
39	0.16	0	0	0	0	0	0.12	0.28	0.21	0.13	0	0	0	0	0	0	0	0	0	0	0	0	0	0	0	0	0	0	0	0.1	0	0	0	0	0	0	0
40	0.21	0	0	0	0	0	0	0.31	0	0.21	0	0	0.13	0	0	0	0	0	0	0	0	0	0	0.08	0	0	0	0	0	0.06	0	0	0	0	0	0	0

## Sheet: soil
	TOC	TN	TP	TK	AP	AK	pH	EC	NO3-	NH4+	SWC
1	4.37427	0.426265	0.303211	16.9992	40.9	168.954	8.47	112.9	12.57	3.61	9.6
2	6.05627	0.552357	0.52074	17.3763	44.7	209.164	8.62	120.8	17.64	6.15	10.2
3	4.63691	0.417248	0.383622	17.0449	24.5	193.399	8.67	111.9	12.2	3.23	10.4
4	4.84099	0.456807	0.381264	17.1521	22.9	145.242	8.96	95.6	5.41	3.02	7.6
5	4.09434	0.338514	0.361888	17.1913	23.9	187.281	8.77	118.4	12.87	3.61	7.6
6	7.34518	0.610159	0.986529	17.696	39.6	135.654	8.51	116	23.39	5.85	7.9
7	5.09724	0.477833	0.475762	17.4488	26.8	116.775	8.61	95.9	11.44	2.85	14.2
8	9.86692	0.867203	0.559211	17.7312	53.6	127.808	8.53	105.7	11.16	3.37	12.4
9	9.23824	0.651736	0.465348	17.7483	25.3	175.437	8.62	128.5	18.6	2.65	12.4
10	7.77299	0.564022	0.602219	17.9802	47.1	106.967	8.53	99.6	12.45	3.09	15.1
11	9.45573	0.942789	0.673544	18.8427	82.1	238.859	8.34	126.3	8.17	2.92	9.9
12	9.8357	0.866773	1.20364	19.2727	30.3	327.761	8.08	3810	216.28	3.11	11.7
13	10.183	0.864041	0.785465	19.0215	50.7	390.807	7.96	1787	202.18	10.84	10.9
14	9.75638	0.835	0.816	18.98	60.4	354.6	8.05	1874	200.45	3.69	11.4
15	9.9826	0.843	0.798	19.21	62.5	321.87	8.48	1821	206.9	3.58	11.3
16	7.79529	0.761924	0.340898	16.6961	49.7	511.063	8.27	543	124.01	11.37	8.1
17	7.77916	0.697989	0.315998	16.93	19	379.642	8.64	422	32.25	4.45	9.9
18	4.27955	0.358513	0.23845	16.5928	8	182.373	8.77	168.7	23.84	3.37	2.9
19	5.68937	0.471122	0.282138	17.6916	13.6	405.979	8.66	375	37.17	3.13	8.9
20	3.77199	0.377512	0.254783	17.2295	9.4	186.425	8.89	128	8.9	3.71	8.3
21	10.1784	0.913658	0.690586	20.0898	24.9	235.063	8.41	224	4.41	2.97	27.4
22	10.7105	1.08773	0.732506	21.2457	25.4	296.047	8.47	207	6.47	3.22	26.5
23	10.8633	0.880103	0.717498	20.8465	26.6	235.736	8.09	351	24.77	2.72	27.8
24	11.1495	0.918898	0.666001	19.8755	20.2	219.569	8.56	191.9	5.68	4.31	28.8
25	10.1464	0.769415	0.915261	18.8219	36.4	197.356	8.59	172.9	13.28	2.6	27.8
26	10.8335	1.03232	1.02278	19.1289	73.9	334.194	8.99	204	13.77	2.58	15.6
27	6.54557	0.54192	0.649791	18.3473	46.3	270.002	8.93	150.2	18.85	3.52	16
28	5.50889	0.509735	0.486884	18.25	29.6	182.336	9.46	168.9	8.01	5.1	17.5
29	6.18719	0.529192	0.679505	18.7356	35.4	237.403	9.16	171.2	13.46	5.53	13.5
30	5.43397	0.423314	0.531608	17.5129	33.6	220.61	9.31	196.3	8.81	4.16	14.6
31	14.6461	1.50109	1.84373	21.6997	125.5	775.41	7.97	4170	37.29	6.61	29.9
32	17.6511	1.85531	1.73445	21.4095	123.3	601.319	7.92	4700	5.67	5.11	27.9
33	19.7077	1.51825	1.67433	20.0542	139.6	597.467	7.86	3940	130.16	3.99	27.9
34	17.7991	1.29635	1.64544	20.2088	101	466.71	7.81	2520	212.03	2.7	29
35	15.6947	1.33525	1.49975	21.2995	87.5	795.714	7.62	5790	30.41	78.87	29
36	4.7208	0.416453	0.438211	17.4044	10.8	73.4552	8.78	227	157.02	6.57	14.4
37	4.37098	0.307147	0.974104	18.1232	27.8	96.8322	8.43	439	213.84	4	14.1
38	3.63262	0.268964	0.478135	17.7519	14.6	68.8087	8.93	131.7	24.18	3.34	14.1
39	4.19374	0.298	0.515	17.29	15.7	83.26	8.54	216.9	167.31	6.28	14.2
40	4.73318	0.326	0.632	17.62	16.4	74.39	8.87	225.4	189.74	5.49	14.1

## Sheet: figure5
		TOC	TN	TP	TK	AP	AK	pH	EC	NO3-	NH4+	SWC	H shannon	D simpson	E pielou	S	H shannon	D simpson	E pielou	S
1	S1	4.37427	0.426265	0.303211	16.9992	40.9	168.954	8.47	112.9	12.57	3.61	9.6	1.29535	0.857774	0.804848	5
2	S1	6.05627	0.552357	0.52074	17.3763	44.7	209.164	8.62	120.8	17.64	6.15	10.2	1.29642	0.615809	0.723544	6	1.27734	0.684829	0.801883	5
3	S1	4.63691	0.417248	0.383622	17.0449	24.5	193.399	8.67	111.9	12.2	3.23	10.4	1.2307	0.669293	0.887761	4
4	S1	4.84099	0.456807	0.381264	17.1521	22.9	145.242	8.96	95.6	5.41	3.02	7.6	1.14451	0.55729	0.711127	5
5	S1	4.09434	0.338514	0.361888	17.1913	23.9	187.281	8.77	118.4	12.87	3.61	7.6	1.41974	0.723976	0.882134	5
6	S2	7.34518	0.610159	0.986529	17.696	39.6	135.654	8.51	116	23.39	5.85	7.9	1.51885	0.724505	0.847686	6	1.47833	0.721481	0.878094	5.4
7	S2	5.09724	0.477833	0.475762	17.4488	26.8	116.775	8.61	95.9	11.44	2.85	14.2	1.39384	0.69209	0.866042	5
8	S2	9.86692	0.867203	0.559211	17.7312	53.6	127.808	8.53	105.7	11.16	3.37	12.4	1.67977	0.791791	0.937499	6
9	S2	9.23824	0.651736	0.465348	17.7483	25.3	175.437	8.62	128.5	18.6	2.65	12.4	1.3528	0.675041	0.840541	5
10	S2	7.77299	0.564022	0.602219	17.9802	47.1	106.967	8.53	99.6	12.45	3.09	15.1	1.44641	0.72398	0.898702	5
11	S3	9.45573	0.942789	0.673544	18.8427	82.1	238.859	8.34	1263	218.17	2.92	9.9	1.38731	0.647162	0.774275	6	1.44679	0.685272	0.845394	5.6
12	S3	9.8357	0.866773	1.20364	19.2727	30.3	327.761	8.08	3810	216.28	3.11	11.7	1.46674	0.691423	0.818603	6
13	S3	10.183	0.864041	0.785465	19.0215	50.7	390.807	7.96	1787	202.18	3.84	10.9	1.42363	0.726875	0.88455	5
14	S3	9.75638	0.835	0.816	18.98	60.4	354.6	8.05	1874	200.45	3.69	11.4	1.57571	0.71685	0.979044	5
15	S3	9.9826	0.843	0.798	19.21	62.5	321.87	8.48	1821	206.9	3.58	11.3	1.38055	0.644051	0.7705	6
16	S4	7.79529	0.761924	0.340898	16.6961	49.7	511.063	8.27	543	24.01	3.37	8.1	1.38206	0.714186	0.858724	5	1.31146	0.687384	0.863364	4.6
17	S4	7.77916	0.697989	0.315998	16.93	19	379.642	8.64	422	32.25	4.45	9.9	1.29923	0.660261	0.807259	5
18	S4	4.27955	0.358513	0.23845	16.5928	8	182.373	8.77	168.7	23.84	3.37	2.9	1.24802	0.683249	0.900257	4
19	S4	5.68937	0.471122	0.282138	17.6916	13.6	405.979	8.66	375	37.17	3.13	8.9	1.17699	0.641618	0.849016	4
20	S4	3.77199	0.377512	0.254783	17.2295	9.4	186.425	8.89	128	8.9	3.71	8.3	1.45101	0.737606	0.901564	5
21	S5	10.1784	0.913658	0.690586	20.0898	24.9	235.063	8.41	224	4.41	2.97	27.4	1.52555	0.76537	0.947877	5	1.53034	0.760206	0.932514	5.2
22	S5	10.7105	1.08773	0.732506	21.2457	25.4	296.047	8.47	207	6.47	3.22	26.5	1.24572	0.683831	0.898597	4
23	S5	10.8633	0.880103	0.717498	20.8465	26.6	235.736	8.09	351	24.77	2.72	27.8	1.4597	0.739188	0.90696	5
24	S5	11.1495	0.918898	0.666001	19.8755	20.2	219.569	8.56	191.9	5.68	4.31	28.8	1.75655	0.821296	0.980347	6
25	S5	10.1464	0.769415	0.915261	18.8219	36.4	197.356	8.59	172.9	13.28	2.6	27.8	1.66417	0.791345	0.928791	6
26	S6	10.8335	1.03232	1.02278	19.1289	73.9	334.194	8.99	204	13.77	2.58	15.6	1.45032	0.682806	0.809436	6	1.44858	0.728304	0.906518	5
27	S6	6.54557	0.54192	0.649791	18.3473	46.3	270.002	8.93	150.2	18.85	3.52	16	1.57347	0.784493	0.977651	5
28	S6	5.50889	0.509735	0.486884	18.25	29.6	182.336	9.46	168.9	8.01	5.1	17.5	1.42421	0.716387	0.88491	5
29	S6	6.18719	0.529192	0.679505	18.7356	35.4	237.403	9.16	171.2	13.46	5.53	13.5	1.55471	0.779169	0.965999	5
30	S6	5.43397	0.423314	0.531608	17.5129	33.6	220.61	9.31	196.3	8.81	4.16	14.6	1.24017	0.678665	0.894594	4
31	S7	14.6461	1.50109	1.84373	21.6997	125.5	775.41	7.97	4170	37.29	6.61	29.9	1.55217	0.779151	0.964415	5	1.36	0.692757	0.868646
32	S7	17.6511	1.85531	1.73445	21.4095	123.3	601.319	7.92	4700	5.67	5.11	27.9	1.18151	0.631962	0.852281	4
33	S7	19.7077	1.51825	1.67433	20.0542	139.6	597.467	7.86	3940	30.16	3.99	27.9	1.39307	0.699232	0.865562	5
34	S7	17.7991	1.29635	1.64544	20.2088	101	466.71	7.81	3520	22.03	2.7	29	1.3978	0.716054	0.868499	5
35	S7	15.6947	1.33525	1.49975	21.2995	87.5	795.714	7.62	5790	30.41	7.87	29	1.27544	0.637387	0.792473	5
36	S8	4.7208	0.416453	0.438211	17.4044	10.8	73.4552	8.78	227	157.02	6.57	14.4	1.63886	0.786453	0.914663	6	1.55319	0.766069	0.927808	5.4
37	S8	4.37098	0.307147	0.974104	18.1232	27.8	96.8322	8.43	439	213.84	4	14.1	1.43321	0.734989	0.890502	5
38	S8	3.63262	0.268964	0.478135	17.7519	14.6	68.8087	8.93	131.7	214.18	3.34	14.1	1.31197	0.709503	0.946385	4
39	S8	4.19374	0.298	0.515	17.29	15.7	83.26	8.54	216.9	167.31	6.28	14.2	1.7273	0.8106	0.964024	6
40	S8	4.73318	0.326	0.632	17.62	16.4	74.39	8.87	225.4	189.74	5.49	14.1	1.65463	0.7888	0.923467	6
		H	D	E	S
	Ⅰ	1.43389	0.71371	0.92047	4.75
	Ⅱ	1.61005	0.76839	0.92796	5.66667
	Ⅲ	1.45653	0.73812	0.91145	5
	Ⅳ	1.31327	0.67748	0.85733	4.66667
	Ⅴ	1.44004	0.687	0.82781	5.75
	Ⅵ	1.34615	0.67975	0.83641	5
	Ⅶ	1.46676	0.726	0.88078	5.33333
	Ⅷ	1.34952	0.71043	0.90091	4.5
	Ⅸ	1.47777	0.74934	0.91819	5
	Ⅹ	1.63886	0.78645	0.91466	6
	Ⅺ	1.53178	0.76097	0.93109	5.25
	Ⅻ	1.31526	0.75035	0.85825	4.66667
	XⅢ	1.14451	0.55729	0.71113	5
	XIV	1.2367	0.62871	0.78628	5
	XV	1.43935	0.70784	0.86231	5.33333
	describe	cos Transform data		F=3.267	P=0.1								describe	F=23.394	P=0
	SOC												TN
		number of cases	average value	Standard deviation	Standard error	95% confidence interval of the mean		minimum value	Maximum					number of cases	average value	Standard deviation	Standard error	95% confidence interval of the mean		minimum value	Maximum
						lower limit	upper limit											lower limit	upper limit
	1	5	0.0223	0.59635	0.2667	-0.7182	0.7628	-0.58	0.98	ab			1	5	0.4382	0.07704	0.03445	0.3425	0.5339	0.34	0.55	cd
	2	5	-0.1881	0.70479	0.31519	-1.0633	0.687	-0.98	0.48	bc			2	5	0.6342	0.14528	0.06497	0.4538	0.8146	0.48	0.87	c
	3	5	-0.8873	0.10408	0.04655	-1.0166	-0.7581	-1	-0.73	c			3	5	0.8704	0.0428	0.01914	0.8173	0.9235	0.84	0.94	b
	4	5	-0.0542	0.61466	0.27488	-0.8174	0.709	-0.81	0.83	ab			4	5	0.5336	0.18561	0.08301	0.3031	0.7641	0.36	0.76	c
	5	5	-0.3479	0.38932	0.17411	-0.8313	0.1355	-0.75	0.15	bc			5	5	0.914	0.11454	0.05123	0.7718	1.0562	0.77	1.09	b
	6	5	0.6337	0.47049	0.21041	0.0496	1.2179	-0.16	1	a			6	5	0.6072	0.24197	0.10821	0.3068	0.9076	0.42	1.03	c
	7	5	0.0045	0.71504	0.31977	-0.8834	0.8923	-1	0.65	ab			7	5	1.501	0.2209	0.09879	1.2267	1.7753	1.3	1.86	a
	8	5	-0.3385	0.37714	0.16866	-0.8068	0.1298	-0.88	0.02	bc			8	5	0.3232	0.0558	0.02495	0.2539	0.3925	0.27	0.42	d
	total	40	-0.1444	0.63149	0.09985	-0.3464	0.0575	-1	1				total	40	0.7277	0.3774	0.05967	0.607	0.8484	0.27	1.86
	describe												describe
	TP	F=33.908	P=0										TK	F=37.306	P=0
		number of cases	average value	Standard deviation	Standard error	95% confidence interval of the mean		minimum value	Maximum					number of cases	average value	Standard deviation	Standard error	95% confidence interval of the mean		minimum value	Maximum
						lower limit	upper limit											lower limit	upper limit
	1	5	0.3902	0.080048	0.035799	0.29081	0.48959	0.303	0.521	d			1	5	17.152	0.14923	0.06674	16.9667	17.3373	17	17.38	e
	2	5	0.6178	0.214167	0.095779	0.35188	0.88372	0.465	0.987	c			2	5	17.722	0.18833	0.08423	17.4882	17.9558	17.45	17.98	de
	3	5	0.8554	0.202627	0.090618	0.60381	1.10699	0.674	1.204	b			3	5	19.064	0.1753	0.0784	18.8463	19.2817	18.84	19.27	c
	4	5	0.2864	0.042442	0.018981	0.2337	0.3391	0.238	0.341	d			4	5	17.028	0.44387	0.1985	16.4769	17.5791	16.59	17.69	e
	5	5	0.7444	0.098721	0.044149	0.62182	0.86698	0.666	0.915	bc			5	5	20.178	0.94094	0.4208	19.0097	21.3463	18.82	21.25	b
	6	5	0.6744	0.210681	0.094219	0.41281	0.93599	0.487	1.023	bc			6	5	18.396	0.60529	0.2707	17.6444	19.1476	17.51	19.13	cd
	7	5	1.6794	0.125967	0.056334	1.52299	1.83581	1.5	1.844	a			7	5	20.934	0.75049	0.33563	20.0021	21.8659	20.05	21.7	a
	8	5	0.6074	0.217359	0.097206	0.33751	0.87729	0.438	0.974	c			8	5	17.636	0.32516	0.14542	17.2323	18.0397	17.29	18.12	e
	total	40	0.73193	0.428193	0.067703	0.59498	0.86887	0.238	1.844				total	40	18.5137	1.43973	0.22764	18.0533	18.9742	16.59	21.7
	describe												describe	F=25.013	P=0
	AP	F=23.092	P=0										AK
		number of cases	average value	Standard deviation	Standard error	95% confidence interval of the mean		minimum value	Maximum					number of cases	average value	Standard deviation	Standard error	95% confidence interval of the mean		minimum value	Maximum
						lower limit	upper limit											lower limit	upper limit
	1	5	31.38	10.5267	4.7077	18.3093	44.4507	22.9	44.7	cde			1	5	180.806	24.5458	10.9772	150.328	211.284	145.24	209.16	cde
	2	5	38.48	12.3926	5.54215	23.0925	53.8675	25.3	53.6	bcd			2	5	132.53	26.3375	11.7785	99.8277	165.232	106.97	175.44	de
	3	5	57.2	18.8693	8.4386	33.7707	80.6293	30.3	82.1	b			3	5	326.78	56.1889	25.1285	257.012	396.548	238.86	390.81	b
	4	5	19.94	17.1784	7.68242	-1.3898	41.2698	8	49.7	de			4	5	333.096	144.377	64.5674	153.828	512.364	182.37	511.06	b
	5	5	26.7	5.94306	2.65782	19.3207	34.0793	20.2	36.4	cde			5	5	236.756	36.6302	16.3815	191.274	282.238	197.36	296.05	bcd
	6	5	43.76	17.9478	8.02649	21.4749	66.0451	29.6	73.9	bc			6	5	248.908	57.1892	25.5758	177.898	319.918	182.34	334.19	bc
	7	5	115.38	20.8316	9.31619	89.5141	141.246	87.5	139.6	a			7	5	647.324	137.521	61.5011	476.57	818.078	466.71	795.71	a
	8	5	17.06	6.38107	2.8537	9.1369	24.9831	10.8	27.8	e			8	5	79.35	11.0818	4.95592	65.5901	93.1099	68.81	96.83	e
	total	40	43.7375	32.9348	5.20744	33.2045	54.2705	8	139.6				total	40	273.194	180.243	28.499	215.549	330.838	68.81	795.71
		describe											describe	lg10Transform data
		PH	F=21.584	P=0									EC	F=25.436	P=0
			number of cases	average value	Standard deviation	Standard error	95% confidence interval of the mean		minimum value	Maximum				number of cases	average value	Standard deviation	Standard error	95% confidence interval of the mean		minimum value	Maximum
							lower limit	upper limit										lower limit	upper limit
		1	5	8.698	0.18213	0.08145	8.4719	8.9241	8.47	8.96	b		1	5	2.04748	0.039958	0.01787	1.99787	2.09709	1.98	2.082
		2	5	8.56	0.05099	0.0228	8.4967	8.6233	8.51	8.62	bc		2	5	2.0355	0.05154	0.02305	1.97151	2.0995	1.982	2.109
		3	5	8.182	0.21845	0.09769	7.9108	8.4532	7.96	8.48	d		3	5	3.09351	0.571613	0.255633	2.38376	3.80326	2.101	3.581
		4	5	8.646	0.23266	0.10405	8.3571	8.9349	8.27	8.89	bc		4	5	2.45369	0.271267	0.121314	2.11687	2.79052	2.107	2.735
		5	5	8.424	0.19995	0.08942	8.1757	8.6723	8.09	8.59	cd		5	5	2.34648	0.118649	0.053061	2.19916	2.4938	2.238	2.545
		6	5	9.17	0.22011	0.09844	8.8967	9.4433	8.93	9.46	a		6	5	2.24807	0.053687	0.02401	2.18141	2.31473	2.177	2.31
		7	5	7.836	0.13502	0.06038	7.6684	8.0036	7.62	7.97	e		7	5	3.61036	0.133223	0.059579	3.44494	3.77578	3.401	3.763
		8	5	8.71	0.21575	0.09649	8.4421	8.9779	8.43	8.93	b		8	5	2.36146	0.185879	0.083128	2.13066	2.59226	2.12	2.642
		total	40	8.5283	0.41312	0.06532	8.3961	8.6604	7.62	9.46			total	40	2.52457	0.564812	0.089305	2.34393	2.7052	1.98	3.763
	describe
	NO3-	F=34.295	P=0	Lg10Transform data									describe
		number of cases	average value	Standard deviation	Standard error	95% confidence interval of the mean		minimum value	Maximum				NH4+	F=2.062	P=0.077
						lower limit	upper limit							number of cases	average value	Standard deviation	Standard error	95% confidence interval of the mean		minimum value	Maximum
	1	5	1.05499	0.191152	0.085486	0.81765	1.29234	0.733	1.246	cd								lower limit	upper limit
	2	5	1.16796	0.143622	0.06423	0.98963	1.34629	1.048	1.369	bcd			1	5	3.924	1.26995	0.56794	2.3471	5.5009	3.02	6.15	abc
	3	5	2.31946	0.016752	0.007492	2.29866	2.34026	2.302	2.339	a			2	5	3.562	1.30703	0.58452	1.9391	5.1849	2.65	5.85	abc
	4	5	1.35716	0.242651	0.108517	1.05587	1.65845	0.949	1.57	b			3	5	3.428	0.39392	0.17616	2.9389	3.9171	2.92	3.84	bc
	5	5	0.94536	0.30739	0.137469	0.56369	1.32704	0.644	1.394	d			4	5	3.606	0.51505	0.23034	2.9665	4.2455	3.13	4.45	abc
	6	5	1.07838	0.152765	0.068319	0.8887	1.26806	0.904	1.275	bcd			5	5	3.164	0.68362	0.30572	2.3152	4.0128	2.6	4.31	c
	7	5	1.32613	0.330326	0.147726	0.91597	1.73628	0.754	1.572	bc			6	5	4.178	1.19005	0.53221	2.7004	5.6556	2.58	5.53	abc
	8	5	2.2717	0.061237	0.027386	2.19567	2.34774	2.196	2.331	a			7	5	5.256	2.05082	0.91716	2.7096	7.8024	2.7	7.87	a
	total	40	1.44014	0.550093	0.086977	1.26422	1.61607	0.644	2.339				8	5	5.136	1.41479	0.63271	3.3793	6.8927	3.34	6.57	ab
													total	40	4.0318	1.32707	0.20983	3.6073	4.4562	2.58	7.87
	describe
	SWC	F=122.997	P=0
		number of cases	average value	Standard deviation	Standard error	95% confidence interval of the mean		minimum value	Maximum
						lower limit	upper limit
	1	5	9.08	1.38275	0.61838	7.3631	10.7969	7.6	10.4	ef
	2	5	12.4	2.77399	1.24056	8.9556	15.8444	7.9	15.1	cd
	3	5	11.04	0.69857	0.31241	10.1726	11.9074	9.9	11.7	de
	4	5	7.62	2.72984	1.22082	4.2305	11.0095	2.9	9.9	f
	5	5	27.66	0.82946	0.37094	26.6301	28.6899	26.5	28.8	a
	6	5	15.44	1.50433	0.67276	13.5721	17.3079	13.5	17.5	b
	7	5	28.74	0.85029	0.38026	27.6842	29.7958	27.9	29.9	a
	8	5	14.18	0.13038	0.05831	14.0181	14.3419	14.1	14.4	bc
	total	40	15.77	7.79652	1.23274	13.2766	18.2634	2.9	29.9

## Sheet: correlation
	H shannon	D simpson	E pielou	S	TOC	TN	TP	TK	AP	AK	pH	EC	NO3-	NH4+	SWC
1	1.29535	0.857774	0.804848	5	4.37427	0.426265	0.303211	16.9992	40.9	168.954	8.47	112.9	12.57	3.61	9.6
2	1.29642	0.615809	0.723544	6	6.05627	0.552357	0.52074	17.3763	44.7	209.164	8.62	120.8	17.64	6.15	10.2
3	1.2307	0.669293	0.887761	4	4.63691	0.417248	0.383622	17.0449	24.5	193.399	8.67	111.9	12.2	3.23	10.4
4	1.14451	0.55729	0.711127	5	4.84099	0.456807	0.381264	17.1521	22.9	145.242	8.96	95.6	5.41	3.02	7.6
5	1.41974	0.723976	0.882134	5	4.09434	0.338514	0.361888	17.1913	23.9	187.281	8.77	118.4	12.87	3.61	7.6
6	1.51885	0.724505	0.847686	6	7.34518	0.610159	0.986529	17.696	39.6	135.654	8.51	116	23.39	5.85	7.9
7	1.39384	0.69209	0.866042	5	5.09724	0.477833	0.475762	17.4488	26.8	116.775	8.61	95.9	11.44	2.85	14.2
8	1.67977	0.791791	0.937499	6	9.86692	0.867203	0.559211	17.7312	53.6	127.808	8.53	105.7	11.16	3.37	12.4
9	1.3528	0.675041	0.840541	5	9.23824	0.651736	0.465348	17.7483	25.3	175.437	8.62	128.5	18.6	2.65	12.4
10	1.44641	0.72398	0.898702	5	7.77299	0.564022	0.602219	17.9802	47.1	106.967	8.53	99.6	12.45	3.09	15.1
11	1.38731	0.647162	0.774275	6	9.45573	0.942789	0.673544	18.8427	82.1	238.859	8.34	126.3	8.17	2.92	9.9
12	1.46674	0.691423	0.818603	6	9.8357	0.866773	1.20364	19.2727	30.3	327.761	8.08	3810	216.28	3.11	11.7
13	1.42363	0.726875	0.88455	5	10.183	0.864041	0.785465	19.0215	50.7	390.807	7.96	1787	202.18	10.84	10.9
14	1.57571	0.71685	0.979044	5	9.75638	0.835	0.816	18.98	60.4	354.6	8.05	1874	200.45	3.69	11.4
15	1.38055	0.644051	0.7705	6	9.9826	0.843	0.798	19.21	62.5	321.87	8.48	1821	206.9	3.58	11.3
16	1.38206	0.714186	0.858724	5	7.79529	0.761924	0.340898	16.6961	49.7	511.063	8.27	543	124.01	11.37	8.1
17	1.29923	0.660261	0.807259	5	7.77916	0.697989	0.315998	16.93	19	379.642	8.64	422	32.25	4.45	9.9
18	1.24802	0.683249	0.900257	4	4.27955	0.358513	0.23845	16.5928	8	182.373	8.77	168.7	23.84	3.37	2.9
19	1.17699	0.641618	0.849016	4	5.68937	0.471122	0.282138	17.6916	13.6	405.979	8.66	375	37.17	3.13	8.9
20	1.45101	0.737606	0.901564	5	3.77199	0.377512	0.254783	17.2295	9.4	186.425	8.89	128	8.9	3.71	8.3
21	1.52555	0.76537	0.947877	5	10.1784	0.913658	0.690586	20.0898	24.9	235.063	8.41	224	4.41	2.97	27.4
22	1.24572	0.683831	0.898597	4	10.7105	1.08773	0.732506	21.2457	25.4	296.047	8.47	207	6.47	3.22	26.5
23	1.4597	0.739188	0.90696	5	10.8633	0.880103	0.717498	20.8465	26.6	235.736	8.09	351	24.77	2.72	27.8
24	1.75655	0.821296	0.980347	6	11.1495	0.918898	0.666001	19.8755	20.2	219.569	8.56	191.9	5.68	4.31	28.8
25	1.66417	0.791345	0.928791	6	10.1464	0.769415	0.915261	18.8219	36.4	197.356	8.59	172.9	13.28	2.6	27.8
26	1.45032	0.682806	0.809436	6	10.8335	1.03232	1.02278	19.1289	73.9	334.194	8.99	204	13.77	2.58	15.6
27	1.57347	0.784493	0.977651	5	6.54557	0.54192	0.649791	18.3473	46.3	270.002	8.93	150.2	18.85	3.52	16
28	1.42421	0.716387	0.88491	5	5.50889	0.509735	0.486884	18.25	29.6	182.336	9.46	168.9	8.01	5.1	17.5
29	1.55471	0.779169	0.965999	5	6.18719	0.529192	0.679505	18.7356	35.4	237.403	9.16	171.2	13.46	5.53	13.5
30	1.24017	0.678665	0.894594	4	5.43397	0.423314	0.531608	17.5129	33.6	220.61	9.31	196.3	8.81	4.16	14.6
31	1.55217	0.779151	0.964415	5	14.6461	1.50109	1.84373	21.6997	125.5	775.41	7.97	4170	37.29	6.61	29.9
32	1.18151	0.631962	0.852281	4	17.6511	1.85531	1.73445	21.4095	123.3	601.319	7.92	4700	5.67	5.11	27.9
33	1.39307	0.699232	0.865562	5	19.7077	1.51825	1.67433	20.0542	139.6	597.467	7.86	3940	130.16	3.99	27.9
34	1.3978	0.716054	0.868499	5	17.7991	1.29635	1.64544	20.2088	101	466.71	7.81	2520	212.03	2.7	29
35	1.27544	0.637387	0.792473	5	15.6947	1.33525	1.49975	21.2995	87.5	795.714	7.62	5790	30.41	78.87	29
36	1.63886	0.786453	0.914663	6	4.7208	0.416453	0.438211	17.4044	10.8	73.4552	8.78	227	157.02	6.57	14.4
37	1.43321	0.734989	0.890502	5	4.37098	0.307147	0.974104	18.1232	27.8	96.8322	8.43	439	213.84	4	14.1
38	1.31197	0.709503	0.946385	4	3.63262	0.268964	0.478135	17.7519	14.6	68.8087	8.93	131.7	24.18	3.34	14.1
39	1.7273	0.8106	0.964024	6	4.19374	0.298	0.515	17.29	15.7	83.26	8.54	216.9	167.31	6.28	14.2
40	1.65463	0.7888	0.923467	6	4.73318	0.326	0.632	17.62	16.4	74.39	8.87	225.4	189.74	5.49	14.1
spermancorrelation
			shannon	simpson	pielou	S
	TOC	Correlation coefficient	0.099	-0.107	-0.074	0.139
		P	0.542	0.511	0.648	0.392
	TN	Correlation coefficient	0.028	-0.176	-0.161	0.126
		P	0.863	0.277	0.322	0.437
	TP	Correlation coefficient	0.278	0.032	0.054	0.236
		P	0.082	0.847	0.742	0.142
	TK	Correlation coefficient	0.208	0.014	0.148	0.057		*p< 0.05, **p< 0.01, ***p< 0.001
		P	0.198	0.929	0.361	0.727
	AP	Correlation coefficient	0.005	-0.133	-0.24	0.155
		P	0.975	0.412	0.136	0.341
	AK	Correlation coefficient	-0.236	-.368*	-0.224	-0.199
		P	0.142	0.02	0.165	0.219
	pH	Correlation coefficient	-0.015	0.013	0.14	-0.055
		P	0.928	0.935	0.388	0.738
	EC	Correlation coefficient	0.052	-0.084	0.025	-0.047
		P	0.752	0.606	0.879	0.774
	NO3	Correlation coefficient	0.2	0.083	-0.02	0.206
		P	0.216	0.609	0.904	0.202
	NH4	Correlation coefficient	0.108	0.161	0.1	0.071
		P	0.505	0.322	0.538	0.662
	SWC	Correlation coefficient	0.297	0.229	.372*	0.008
		P	0.062	0.155	0.018	0.959
** 0.01
* 0.05
person	correlation
			shannon	simpson	pielou	S
	TOC	correlation coefficient	0.003	-0.125	-0.051	0.038
		P	0.983	0.443	0.753	0.816
	TN	correlation coefficient	-0.061	-0.168	-0.084	-0.008
		P	0.71	0.299	0.605	0.962
	TP	correlation coefficient	0.073	-0.05	0.013	0.078
		P	0.653	0.757	0.936	0.633
	TK	correlation coefficient	0.069	-0.016	0.134	-0.04
		P	0.673	0.924	0.409	0.807
	AP	correlation coefficient	-0.08	-0.154	-0.148	0.028
		P	0.622	0.343	0.362	0.865
	AK	correlation coefficient	-0.245	-0.26	-0.14	-0.205
		P	0.127	0.105	0.389	0.204
	pH	correlation coefficient	0.018	0.063	0.094	-0.044
		P	0.911	0.702	0.564	0.79
	EC	correlation coefficient	-0.145	-0.22	-0.131	-0.078
		P	0.372	0.172	0.421	0.633
	NO3	correlation coefficient	0.262	0.109	0.049	0.288
		P	0.103	0.502	0.762	0.072
	NH4	correlation coefficient	-0.13	-0.173	-0.189	-0.011
		P	0.426	0.284	0.242	0.944
	SWC	correlation coefficient	0.21	0.2	0.299	-0.028
		P	0.194	0.215	0.061	0.864
** 0.01
* 0.05
correlation
			H
Spearman Rho	H	correlation coefficient	1
		P	.	D
	D	correlation coefficient	.813**	1
		P	0	.	E
	E	correlation coefficient	.663**	.720**	1
		P	0	0	.	S
	S	correlation coefficient	.647**	.341*	-0.066	1
		P	0	0.032	0.688	.	TOC
	TOC	correlation coefficient	0.099	-0.107	-0.074	0.139	1
		P	0.542	0.511	0.648	0.392	.	TN
	TN	correlation coefficient	0.028	-0.176	-0.161	0.126	.970**	1
		P	0.863	0.277	0.322	0.437	0	.	TP
	TP	correlation coefficient	0.278	0.032	0.054	0.236	.751**	.702**	1
		P	0.082	0.847	0.742	0.142	0	0	.	TK
	TK	correlation coefficient	0.208	0.015	0.15	0.056	.819**	.782**	.867**	1
		P	0.198	0.926	0.354	0.733	0	0	0	.	AP
	AP	correlation coefficient	0.005	-0.133	-0.24	0.155	.685**	.715**	.706**	.563**	1
		P	0.975	0.412	0.136	0.341	0	0	0	0	.	AK
	AK	correlation coefficient	-0.236	-.368*	-0.224	-0.199	.722**	.744**	.466**	.533**	.585**	1
		P	0.142	0.02	0.165	0.219	0	0	0.002	0	0	.	pH
	pH	correlation coefficient	-0.015	0.013	0.14	-0.055	-.654**	-.666**	-.598**	-.558**	-.588**	-.521**	1
		P	0.928	0.935	0.388	0.738	0	0	0	0	0	0.001	.	EC
	EC	correlation coefficient	0.052	-0.084	0.025	-0.047	.563**	.486**	.575**	.574**	.342*	.682**	-.576**	1
		P	0.752	0.606	0.879	0.774	0	0.001	0	0	0.031	0	0	.	NO3-
	NO3-	correlation coefficient	0.2	0.083	-0.02	0.206	0.048	-0.055	0.252	0.064	0.121	0.18	-.340*	.598**	1
		P	0.216	0.609	0.904	0.202	0.767	0.736	0.117	0.694	0.457	0.267	0.032	0	.	NH4+
	NH4+	correlation coefficient	0.108	0.161	0.1	0.071	-0.094	-0.108	0.028	-0.113	0.071	0.111	-0.093	.334*	0.262	1
		P	0.505	0.322	0.538	0.662	0.565	0.507	0.866	0.488	0.663	0.494	0.569	0.035	0.102	.	SWC
	SWC	correlation coefficient	0.297	0.229	.372*	0.008	.616**	.529**	.646**	.756**	.363*	0.256	-0.297	.436**	-0.039	-0.04	1
		P	0.062	0.155	0.018	0.959	0	0	0	0	0.021	0.11	0.062	0.005	0.812	0.806	.
** 0.01
* 0.05

## Sheet: CCA
Analysis 'Constrained'								Analysis 'Constrained-7'					Analysis 'Constrained-7'
Method: CCA								Simple Term Effects:					Conditional Term Effects:
Total variation is 5.46331, explanatory variables account for 37.2%								Name	Explains %	pseudo-F	P		Name	Explains %	pseudo-F	P
(adjusted explained variation is 12.6%)								TK	5.9	2.4	0.001		TK	5.9	2.4	0.001
								SWC	5.8	2.4	0.001		AK	4.9	2	0.004
Summary Table:								NO3-	4.8	1.9	0.003		EC	4.6	1.9	0.006
Statistic	Axis 1	Axis 2	Axis 3	Axis 4				TN	4.4	1.8	0.007		NO3-	3.8	1.6	0.019
Eigenvalues	0.4387	0.4147	0.3599	0.2247				TOC	4.4	1.7	0.009		pH	4.1	1.8	0.008
Explained variation (cumulative)	8.03	15.62	22.21	26.32				AK	4.2	1.7	0.028		SWC	3.4	1.5	0.046
Pseudo-canonical correlation	0.9276	0.9011	0.8848	0.869				TP	3.8	1.5	0.051		TP	3	1.4	0.132
Explained fitted variation (cumulative)	21.56	41.94	59.63	70.67				EC	3.8	1.5	0.078		NH4+	2.5	1.1	0.326
								pH	3.7	1.5	0.051		AP	2	0.9	0.602
Permutation Test Results:								AP	3.3	1.3	0.137		TN	1.9	0.9	0.653
On All Axes	pseudo-F=1.5, P=0.002							NH4+	2.3	0.9	0.524		TOC	1.2	0.5	0.97
	AvgE	SDE	VIFE	regression 1	regression 2	regression 3	regression 4	Tvalue.1	Tvalue.2	Tvalue.3	Tvalue.4	EtBi.1	EtBi.2	Correlation 1	Correlation 2	Correlation 3	Correlation 4	BipE.1	BipE.2	BipE.3	BipE.4	CenE.1	CenE.2	CenE.3	CenE.4
TOC	8.4151	4.1005	23.4067	0.412	0.1819	-0.3368	0.0064	1.1188	0.4134	-0.6996	0.0123	0.0852	0.0376	-0.1826	0.3884	0.2755	-0.5474	-0.1968	0.431	0.3114	-0.6299	-0.0959	0.21	0.1517	-0.3069
TN	0.7279	0.3726	32.159	0.0102	0.5849	0.4579	-1.067	0.0237	1.134	0.8114	-1.7481	0.0018	0.1031	-0.1572	0.4058	0.2644	-0.5562	-0.1695	0.4504	0.2988	-0.6401	-0.0868	0.2306	0.153	-0.3277
TP	0.7322	0.4227	11.7401	-0.3876	-0.5619	0.0201	0.0596	-1.4864	-1.8031	0.0591	0.1617	-0.1131	-0.164	-0.1133	0.3652	0.3189	-0.318	-0.1222	0.4053	0.3605	-0.3659	-0.0705	0.234	0.2081	-0.2112
TK	18.5135	1.4204	8.5789	0.2165	1.2436	-0.2438	0.3061	0.9714	4.6679	-0.8366	0.971	0.0739	0.4246	-0.2701	0.6718	0.1275	-0.3404	-0.2912	0.7456	0.1441	-0.3917	-0.0223	0.0572	0.0111	-0.0301
AP	43.7558	32.499	7.4728	-0.4114	-0.5722	0.1204	0.0208	-1.9775	-2.3014	0.4425	0.0706	-0.1505	-0.2093	-0.1334	0.088	0.3702	-0.4381	-0.1438	0.0976	0.4184	-0.5042	-0.1068	0.0725	0.3108	-0.3745
AK	273.197	177.868	5.7889	-0.8685	-0.5898	1.155	0.1755	-4.7428	-2.6948	4.8237	0.6777	-0.361	-0.2451	-0.1632	0.1771	0.535	-0.3341	-0.176	0.1966	0.6047	-0.3845	-0.1146	0.128	0.3937	-0.2504
pH	8.528	0.4076	3.3935	-0.1144	0.5953	0.5222	1.0614	-0.8161	3.5527	2.8486	5.3534	-0.0621	0.3231	-0.0746	-0.1871	-0.2696	0.6608	-0.0804	-0.2077	-0.3047	0.7605	-0.0038	-0.0099	-0.0146	0.0363
EC	913.649	1478.47	9.4589	1.768	0.7499	-0.5001	0.7244	7.5531	2.6807	-1.634	2.1884	0.5749	0.2438	0.1367	0.3359	0.4271	-0.2516	0.1473	0.3727	0.4827	-0.2896	0.2384	0.6032	0.7812	-0.4686
NO3-	62.1632	77.2193	2.229	-0.1521	0.3177	0.9377	0.1437	-1.3382	2.3396	6.311	0.8944	-0.1019	0.2128	0.311	0.1408	0.5897	-0.0391	0.3352	0.1562	0.6665	-0.045	0.4164	0.1941	0.8279	-0.0559
NH4+	6.1688	11.7569	2.2319	-0.5309	-0.0197	0.1096	0.0671	-4.6689	-0.1448	0.7375	0.4173	-0.3554	-0.0132	-0.2165	0.0968	0.1834	0.0221	-0.2333	0.1074	0.2072	0.0254	-0.4447	0.2047	0.395	0.0485
SWC	15.7614	7.6938	5.4479	-0.9681	-0.1222	0.0174	0.1838	-5.4497	-0.5754	0.0747	0.7316	-0.4148	-0.0523	-0.5212	0.5376	0.0023	-0.2452	-0.5618	0.5966	0.0026	-0.2822	-0.2743	0.2912	0.0012	-0.1378

## Sheet: CCA-FP value
Analysis 'Constrained'					Analysis 'Constrained'
Simple Term Effects:					Conditional Term Effects:
Name	Explains %	pseudo-F	P		Name	Explains %	pseudo-F	P
TK	5.9	2.4	0.002		TK	5.9	2.4	0.002
SWC	5.8	2.4	0.002		AK	4.9	2	0.002
NO3-	4.8	1.9	0.008		EC	4.6	1.9	0.008
TN	4.4	1.8	0.01		NO3-	3.8	1.6	0.02
TOC	4.4	1.7	0.014		pH	4.1	1.8	0.008
AK	4.2	1.7	0.028		SWC	3.4	1.5	0.052
TP	3.8	1.5	0.042		TP	3	1.4	0.124
EC	3.8	1.5	0.07		NH4+	2.5	1.1	0.304
pH	3.7	1.5	0.068		AP	2	0.9	0.588
AP	3.3	1.3	0.138		TN	1.9	0.9	0.686
NH4+	2.3	0.9	0.512		TOC	1.2	0.5	0.964

## Sheet: DCA
Analysis 'Unconstrained'
Method: DCA
Total variation is 5.46331
Summary Table:
Statistic	Axis 1	Axis 2	Axis 3	Axis 4
Eigenvalues	0.5813	0.5025	0.3093	0.1934
Explained variation (cumulative)	10.64	19.84	25.5	29.04
Gradient length	4.36	3.56	2.61	2.16
