# Supplementary material for: Composition and environmental interpretation of the weed communities in the main planting base of jujube (Ziziphus jujuba Mill. cv. ‘LingwuChangzao’), Ningxia province of China
Source: PeerJ. 2022 Jun 17;10:e13583. doi: 10.7717/peerj.13583 (PMC9208373; doi:10.7717/peerj.13583)
Supplement: Supplemental Information 2 [file peerj-10-13583-s002.xlsx]

## Sheet: Yinhu 5
Field vegetation questionnaire
Sample plot No： 1 Yinhu Survey date： August 20th, 2021
E:106。23′32″ N:37。53′57″ altitude： 1180m Quadrat：1 GPS time12：17
Serial number	Plant name	density	frequency	coverage	height（cm)						Aboveground biomass(g)			Underground biomass(g)			soil temperature	soil moisture
					1	2	3	4	5	averageheight	Envelope weight	Total dry weight	dry weight	Envelope weight	Total dry weight	dry weight			Relative abundance	Relativefrequency	Relativecoverage	Relativeheight	importance value	Pi	Pi^2	D=1-∑Pi^2	lnPi	PilnPi	H=-∑PilnPi	lnS	E=H/lnS	Patrick
1	Chenopodium glaucum	32	13	53	26	31.5	29.9	54	42.3	36.74	13.79	81.37	67.58	13.88	122.03	108.15	38.9	9.6	0.4	0.464286	0.588889	0.255033	0.427052	0.427052	0.182373		-0.85085	-0.363357
2	Digitaria sanguinalis	43	14	27	7.8	8.1	10.3	12.1	14.5	10.56	14.66	42.65	27.99	14.51	35.86	21.35			0.5375	0.5	0.3	0.0733028	0.352701	0.352701	0.124398		-1.04214	-0.367562
3	Echinochloa crusgalli	1		1	30	29.9	26.7	30.5	42	31.82	14.09	14.31	0.22	13.32	13.56	0.24			0.0125	0	0.0111111	0.22088	0.0611228	0.0611228	0.003736		-2.79487	-0.17083
4	Salsola collina	2		5	55.3	62	51	42	38	49.66	13.63	30.49	16.86	13.51	15.41	1.9			0.025	0	0.0555556	0.344717	0.106318	0.106318	0.0113036		-2.24132	-0.238293
5	Echinops gmelini	2	1	4	16.8	14.7	15.2	15.9	13.8	15.28	13.44	15.68	2.24	13.5	14.54	1.04			0.025	0.0357143	0.0444444	0.106067	0.0528064	0.0528064	0.00278852		-2.94112	-0.15531
6	5	80	28	90						144.06			114.89			132.68			1	1	1	1	1	1	0.142226	0.857774		-1.29535	1.29535	1.60944	0.804848	5
7
Field vegetation questionnaire
Sample plot No：2 Yinhu Survey date： August 20th, 2021
E:106。23′32″ N:37。53′57″ altitude： 1180m Quadrat：2 GPS time12：17
Serial number	Plant name	density	frequency	coverage	height（cm)						Aboveground biomass(g)			Underground biomass(g)			soil temperature	soil moisture
					1	2	3	4	5	averageheight	Envelope weight	Total dry weight	dry weight	Envelope weight	Total dry weight	dry weight			Relative abundance	Relativefrequency	Relativecoverage	Relativeheight	importance value	Pi	Pi^2	D=1-∑Pi^2	lnPi	PilnPi	H=-∑PilnPi	lnS	E=H/lnS	Patrick
1	Digitaria sanguinalis	37	22	66	15	13	14.2	8.7	14	12.98	14.04	38.75	24.71	13.74	67.57	53.83	36.8	10.2	0.72549	0.733333	0.767442	0.105752	0.583004	0.583004	0.339894		-0.539561	-0.314566
2	Chenopodium glaucum	1	4	3	57.3	69.5	51.2	38.5	62.5	55.8	14.19	102.27	88.08	13.86	18.68	4.82			0.0196078	0.133333	0.0348837	0.45462	0.160611	0.160611	0.0257959		-1.82877	-0.293721
3	Lepidium apetalum	2	1	5	15.8	14.7	11.6	18.7	16.3	15.42	13.41	15.71	2.3	13.45	13.51	0.06			0.0392157	0.0333333	0.0581395	0.125631	0.06408	0.06408	0.00410625		-2.74762	-0.176068
4	Cynanchum chinense	5		9	21.6	25.4	19.8	20.7	29.3	23.36	15.4	21.2	5.8	15.32	21.42	6.1			0.0980392	0	0.104651	0.190321	0.0982528	0.0982528	0.00965362		-2.32021	-0.227967
5	Ixeris chinensis	3		2	6.4	6.8	7.3	7.9	5.7	6.82	4.54	6.91	2.37	4.62	4.95	0.33			0.0588235	0	0.0232558	0.0555646	0.034411	0.034411	0.00118412		-3.36938	-0.115944
6	Lactucatatarica	3	3	1	9.7	8.5	7.3	7.4	8.9	8.36	13.54	13.99	0.45	13.62	13.98	0.36			0.0588235	0.1	0.0116279	0.0681115	0.0596407	0.0596407	0.00355702		-2.81942	-0.168152
7	6	51	30	86						122.74									1	1	1	1	1	1	0.384191	0.615809		-1.29642	1.29642	1.79176	0.723544	6
8
9
Field vegetation questionnaire
Sample plot No：3 Yinhu Survey date： August 20th, 2021
E:106。23′32″ N:37。53′57″ altitude： 1180m Quadrat：3 GPS time12：17
Serial number	Plant name	density	frequency	coverage	height（cm)						Aboveground biomass(g)			Underground biomass(g)			soil temperature	soil moisture
					1	2	3	4	5	averageheight	Envelope weight	Total dry weight	dry weight	Envelope weight	Total dry weight	dry weight			Relative abundance	Relativefrequency	Relativecoverage	Relativeheight	importance value	Pi	Pi^2	D=1-∑Pi^2	lnPi	PilnPi	H=-∑PilnPi	lnS	E=H/lnS	Patrick
1	Digitaria sanguinalis	27	56	29	12.6	8.4	14.9	15.4	12.7	12.8	13.9	57.41	43.51	13.77	41.46	27.69	32.9	10.4	0.675	0.8	0.284314	0.122254	0.470392	0.470392	0.221269		-0.754189	-0.354764
2	Chenopodium glaucum	8	9	44	41.7	56.7	23.4	33.2	31.6	37.32	13.67	103.47	89.8	13.82	58.15	44.33			0.2	0.128571	0.431373	0.356447	0.279098	0.279098	0.0778955		-1.27619	-0.356183
3	Lappula heteracantha	2		18	23.7	21.2	26.8	25.4	27.6	24.94	13.52	37.43	23.91	13.53	16.29	2.76			0.05	0	0.176471	0.238204	0.116169	0.116169	0.0134952		-2.15271	-0.250078
4	Ephedra	3	5	11	25.8	31.2	34.5	29.6	27.1	29.64	13.66	17.92	4.26	13.49	14.54	1.05			0.075	0.0714286	0.107843	0.283095	0.134342	0.134342	0.0180477		-2.00737	-0.269673
5	4	40	70	102						104.7									1	1	1	1	1	1	0.330707	0.669293		-1.2307	1.2307	1.38629	0.887761	4
6
7
8
Field vegetation questionnaire
Sample plot No： 4 Yinhu Survey date： August 20th, 2021
E:106。23′32″ N:37。53′57″ altitude： 1180m Quadrat：4 GPS time12：17
Serial number	Plant name	density	frequency	coverage	height（cm)						Aboveground biomass(g)			Underground biomass(g)			soil temperature	soil moisture
					1	2	3	4	5	averageheight	Envelope weight	Total dry weight	dry weight	Envelope weight	Total dry weight	dry weight			Relative abundance	Relativefrequency	Relativecoverage	Relativeheight	importance value	Pi	Pi^2	D=1-∑Pi^2	lnPi	PilnPi	H=-∑PilnPi	lnS	E=H/lnS	Patrick
1	Digitaria sanguinalis	33	72	92	14.3	10.4	8.5	18.6	19.3	14.22	13.95	88.41	74.46	13.57	164.97	151.4	31.4	7.6	0.717391	0.857143	0.844037	0.137657	0.639057	0.639057	0.408394		-0.447762	-0.286145
2	Chenopodium album	2	8	3	41.3	29.6	33.1	23.4	27.5	30.98	15.28	77.49	62.21	7.31	26.94	19.63			0.0434783	0.0952381	0.0275229	0.299903	0.116536	0.116536	0.0135806		-2.14956	-0.2505
3	Ephedra	4	1	5	29.9	28.2	31.1	24.4	25.3	27.78	13.45	19.68	6.23	13.62	15.18	1.56			0.0869565	0.0119048	0.0458716	0.268925	0.103415	0.103415	0.0106946		-2.26901	-0.234649
4	Lactucatatarica	5	3	4	6.1	5.9	7.8	8.4	9.2	7.48	15.15	15.99	0.84	15.26	16.06	0.8			0.108696	0.0357143	0.0366972	0.0724105	0.0633794	0.0633794	0.00401695		-2.75862	-0.174839
5	Cynanchum chinense	2		5	25.5	21.8	23.6	20.9	22.4	22.84	14.62	17.12	2.5	14.53	16.69	2.16			0.0434783	0	0.0458716	0.221104	0.0776134	0.0776134	0.00602383		-2.55602	-0.198381
6	5	46	84	109						103.3									1	1	1	1	1	1	0.44271	0.55729		-1.14451	1.14451	1.60944	0.711127	5
7
8
9
Field vegetation questionnaire
Sample plot No： 5 Yinhu Survey date： August 20th, 2021
E:106。23′32″ N:37。53′57″ altitude： 1180m Quadrat：5 GPS time12：17
Serial number	Plant name	density	frequency	coverage	height（cm)						Aboveground biomass(g)			Underground biomass(g)			soil temperature	soil moisture
					1	2	3	4	5	averageheight	Envelope weight	Total dry weight	dry weight	Envelope weight	Total dry weight	dry weight			Relative abundance	Relativefrequency	Relativecoverage	Relativeheight	importance value	Pi	Pi^2	D=1-∑Pi^2	lnPi	PilnPi	H=-∑PilnPi	lnS	E=H/lnS	Patrick
1	Digitaria sanguinalis	13	30	29	8.6	10.3	14.3	12.9	11.2	11.46	13.84	29.66	15.82	13.55	31.5	17.95	30.6	7.6	0.333333	0.697674	0.325843	0.0863732	0.360806	0.360806	0.130181		-1.01942	-0.367811
2	Echinochloa crusgalli	3		6	13.4	15.6	20.6	18.7	24.3	18.52	13.53	18.1	4.57	13.49	22.54	9.05			0.0769231	0	0.0674157	0.139584	0.0709807	0.0709807	0.00503826		-2.64535	-0.187769
3	Chenopodium glaucum	18	10	40	44.1	28.4	22.1	21.7	22.3	27.72	13.74	86.93	73.19	12.29	110.98	98.69			0.461538	0.232558	0.449438	0.208924	0.338115	0.338115	0.114322		-1.08437	-0.366641
4	Lappula heteracantha	1	1	6	52.3	50.8	44.6	38.7	47.8	46.84	13.45	29.58	16.13	13.57	15.04	1.47			0.025641	0.0232558	0.0674157	0.35303	0.117336	0.117336	0.0137676		-2.14272	-0.251417
5	Ephedra	4	2	8	28.7	26.6	24.9	31.1	29.4	28.14	13.51	19.58	6.07	13.62	15.16	1.54			0.102564	0.0465116	0.0898876	0.212089	0.112763	0.112763	0.0127155		-2.18247	-0.246102
6	5	39	43	89						132.68									1	1	1	1	1	1	0.276024	0.723976		-1.41974	1.41974	1.60944	0.882134	5
7

## Sheet: Xunkun 10
Field vegetation questionnaire
Sample plot No： 6 Xunkun Survey date： August 20th, 2021
E:106。22′26″ N:37◦54′10″ altitude： 1170m Quadrat：1 GPS time16：01
Serial number	Plant name	density	frequency	coverage	height（cm)						Aboveground biomass(g)			Underground biomass(g)			soil temperature	soil moisture
					1	2	3	4	5	averageheight	Envelope weight	Total dry weight	dry weight	Envelope weight	Total dry weight	dry weight			Relative abundance	Relativefrequency	Relativecoverage	Relativeheight	importance value	Pi	Pi^2	D=1-∑Pi^2	lnPi	PilnPi	H=-∑PilnPi	lnS	E=H/lnS	Patrick
1	Digitaria sanguinalis	14	15	59	40.1	36.7	33.4	30.1	19.3	31.92	13.68	48.17	34.49	13.53	55	41.47	25.8	7.9	0.411765	0.454545	0.670455	0.269231	0.451499	0.451499	0.203851		-0.795182	-0.359024
2	Chenopodium glaucum	8	7	8	36.5	14.3	20.1	16.3	19.8	21.4	13.72	17.44	3.72	13.56	15.7	2.14			0.235294	0.212121	0.0909091	0.180499	0.179706	0.179706	0.0322942		-1.71643	-0.308453
3	Portulaca oleracea	6	7	11	10	11.3	12.6	6.5	9.8	10.04	13.72	18.62	4.9	13.64	19.05	5.41			0.176471	0.212121	0.125	0.0846829	0.149569	0.149569	0.0223708		-1.9	-0.28418
4	Sophora alopecuroides	2		1	23.4	13.1	20.6	14.6	18.7	18.08	13.48	14.15	0.67	13.52	14.03	0.51			0.0588235	0	0.0113636	0.152497	0.0556709	0.0556709	0.00309925		-2.8883	-0.160794
5	Lepidium apetalum	3	4	6	11.4	15.3	14.6	13.8	11.9	13.4	13.45	17.8	4.35	13.45	15.37	1.92			0.0882353	0.121212	0.0681818	0.113023	0.097663	0.097663	0.00953807		-2.32623	-0.227187
6	Lappula heteracantha	1		3	22.6	21.8	23.9	25.4	24.9	23.72	13.61	24.89	11.28	13.54	14.88	1.34			0.0294118	0	0.0340909	0.200067	0.0658925	0.0658925	0.00434183		-2.71973	-0.17921
7	6	34	33	88						118.56									1	1	1	1	1	1	0.275495	0.724505		-1.51885	1.51885	1.79176	0.847686	6
8
Field vegetation questionnaire
Sample plot No：7 Xunkun Survey date： August 20th, 2021
E:106。22′26″ N:37◦54′10″ altitude： 1170m Quadrat：2 GPS time16：01
Serial number	Plant name	density	frequency	coverage	height（cm)						Aboveground biomass(g)			Underground biomass(g)			soil temperature	soil moisture
					1	2	3	4	5	averageheight	Envelope weight	Total dry weight	dry weight	Envelope weight	Total dry weight	dry weight			Relative abundance	Relativefrequency	Relativecoverage	Relativeheight	importance value	Pi	Pi^2	D=1-∑Pi^2	lnPi	PilnPi	H=-∑PilnPi	lnS	E=H/lnS	Patrick
1	Digitaria sanguinalis	21	19	55	10.4	11.2	8.6	9.7	12.3	10.44	13.84	48.61	34.77	13.82	34.68	20.86	25.8	14.2	0.636364	0.59375	0.647059	0.0956044	0.493194	0.493194	0.243241		-0.706852	-0.348615
2	Portulaca oleracea	4	7	3	16.7	13.2	7.6	12.4	13.7	12.72	13.57	41.52	27.95	13.92	52.26	38.34			0.121212	0.21875	0.0352941	0.116484	0.122935	0.122935	0.015113		-2.0961	-0.257684
3	Lepidium apetalum	4	5	9	15.6	14.3	16.2	12.7	13.5	14.46	13.45	19.53	6.08	13.45	13.81	0.36			0.121212	0.15625	0.105882	0.132418	0.128941	0.128941	0.0166257		-2.0484	-0.264122
4	Potentilla supina	3	1	10	21.8	22.4	23.5	21.6	25.9	23.04	13.4	20.75	7.35	13.62	13.86	0.24			0.0909091	0.03125	0.117647	0.210989	0.112699	0.112699	0.012701		-2.18304	-0.246026
5	Rumex acetosa	1		8	48.9	51.4	50.9	47.3	44.2	48.54	13.54	47.75	34.21	13.51	29.6	16.09			0.030303	0	0.0941176	0.444505	0.142232	0.142232	0.0202298		-1.9503	-0.277394
6	5	33	32	85						109.2									1	1	1	1	1	1	0.30791	0.69209		-1.39384	1.39384	1.60944	0.866042	5
7
8
9
Field vegetation questionnaire
Sample plot No： 8 Xunkun Survey date： August 20th, 2021
E:106。22′26″ N:37◦54′10″ altitude： 1170m Quadrat：3 GPS time16：01
Serial number	Plant name	density	frequency	coverage	height（cm)						Aboveground biomass(g)			Underground biomass(g)			soil temperature	soil moisture
					1	2	3	4	5	averageheight	Envelope weight	Total dry weight	dry weight	Envelope weight	Total dry weight	dry weight			Relative abundance	Relativefrequency	Relativecoverage	Relativeheight	importance value	Pi	Pi^2	D=1-∑Pi^2	lnPi	PilnPi	H=-∑PilnPi	lnS	E=H/lnS	Patrick
1	Digitaria sanguinalis	5	9	25	20.1	18.7	12.3	15.7	10.1	15.38	13.68	26.73	13.05	5.41	18.62	13.21	29.5	12.4	0.227273	0.473684	0.480769	0.156843	0.334642	0.334642	0.111985		-1.09469	-0.366331
2	Portulaca oleracea	7	5	8	5.7	6	6.3	4.6	4.8	5.48	13.74	17.73	3.99	13.51	16.02	2.51			0.318182	0.263158	0.153846	0.0558842	0.197768	0.197768	0.039112		-1.62066	-0.320515
3	Echinochloa crusgalli	1	2	3	31.2	32.6	28.7	25.4	29.1	29.4	13.45	14.83	1.38	13.55	14.7	1.15			0.0454545	0.105263	0.0576923	0.299816	0.127057	0.127057	0.0161434		-2.06312	-0.262133
4	Potentilla supina	3	2	6	25.4	21.3	22.9	24.8	23.6	23.6	13.54	21.62	8.08	13.62	13.98	0.36			0.136364	0.105263	0.115385	0.240669	0.14942	0.14942	0.0223264		-1.90099	-0.284047
5	Echinops gmelini	2		4	15.4	13.8	17.6	16.2	15.1	15.62	13.62	15.58	1.96	13.55	14.45	0.9			0.0909091	0	0.0769231	0.15929	0.0817806	0.0817806	0.00668807		-2.50372	-0.204755
6	Sophora alopecuroides	4	1	6	8.6	9.1	7.5	8.3	9.4	8.58	5.45	7.48	2.03	5.61	10.07	4.46			0.181818	0.0526316	0.115385	0.0874975	0.109333	0.109333	0.0119537		-2.21336	-0.241993
7	6	22	19	52						98.06									1	1	1	1	1	1	0.208209	0.791791		-1.67977	1.67977	1.79176	0.937499	6
8
Field vegetation questionnaire
Sample plot No： 9 Xunkun Survey date： August 20th, 2021
E:106。22′26″ N:37◦54′10″ altitude： 1170m Quadrat：4 GPS time16：01
Serial number	Plant name	density	frequency	coverage	height（cm)						Aboveground biomass(g)			Underground biomass(g)			soil temperature	soil moisture
					1	2	3	4	5	averageheight	Envelope weight	Total dry weight	dry weight	Envelope weight	Total dry weight	dry weight			Relative abundance	Relativefrequency	Relativecoverage	Relativeheight	importance value	Pi	Pi^2	D=1-∑Pi^2	lnPi	PilnPi	H=-∑PilnPi	lnS	E=H/lnS	Patrick
1	Digitaria sanguinalis	14	11	42	7.3	6.4	8.2	9.1	14.3	9.06	5.37	13.32	7.95	5.38	32.3	26.92	26.5	12.4	0.583333	0.52381	0.792453	0.139299	0.509724	0.509724	0.259818		-0.673887	-0.343496
2	Chenopodium glaucum	4	2	1	12.4	13.8	10	11.6	15.7	12.7	5.36	9.98	4.62	5.62	13.18	7.56			0.166667	0.0952381	0.0188679	0.195264	0.119009	0.119009	0.0141632		-2.12855	-0.253318
3	Portulaca oleracea	1	2	1	11.3	10.2	9.7	11.6	13.5	11.26	5.4	5.56	0.16	5.33	5.44	0.11			0.0416667	0.0952381	0.0188679	0.173124	0.0822242	0.0822242	0.00676082		-2.49831	-0.205421
4	Echinochloa crusgalli	2	1	1	19.7	16.5	21.3	18.2	18.1	18.76	5.32	7.93	2.61	5.36	12.38	7.02			0.0833333	0.047619	0.0188679	0.288438	0.109565	0.109565	0.0120044		-2.21124	-0.242274
5	Lactucatatarica	3	5	8	12.9	13.5	14.4	13.8	11.7	13.26	5.45	8.86	3.41	5.52	6.09	0.57			0.125	0.238095	0.150943	0.203875	0.179478	0.179478	0.0322125		-1.7177	-0.30829
6	5	24	21	53						65.04									1	1	1	1	1	1	0.324959	0.675041		-1.3528	1.3528	1.60944	0.840541	5
7
8
Field vegetation questionnaire
Sample plot No： 10 Xunkun Survey date： August 20th, 2021
E:106。22′26″ N:37◦54′10″ altitude： 1170m Quadrat：5 GPS time16：01
Serial number	Plant name	density	frequency	coverage	height（cm)						Aboveground biomass(g)			Underground biomass(g)			soil temperature	soil moisture
					1	2	3	4	5	averageheight	Envelope weight	Total dry weight	dry weight	Envelope weight	Total dry weight	dry weight			Relative abundance	Relativefrequency	Relativecoverage	Relativeheight	importance value	Pi	Pi^2	D=1-∑Pi^2	lnPi	PilnPi	H=-∑PilnPi	lnS	E=H/lnS	Patrick
1	Digitaria sanguinalis	17	9	26	5	10	8	7.4	9.6	8	5.33	15.19	9.86	5.76	13.22	7.46	28.4	15.1	0.548387	0.375	0.666667	0.158667	0.43718	0.43718	0.191127		-0.82741	-0.361727
2	Portulaca oleracea	5	5	1	8.3	7.9	9.3	4.5	9.2	7.84	5.4	5.72	0.32	5.35	5.53	0.18			0.16129	0.208333	0.025641	0.155494	0.13769	0.13769	0.0189584		-1.98275	-0.273005
3	Chenopodium glaucum	3	4	1	6.7	9.3	8.2	9.1	6.3	7.92	5.75	7.06	1.31	5.71	5.85	0.14			0.0967742	0.166667	0.025641	0.157081	0.111541	0.111541	0.0124413		-2.19337	-0.244649
4	Lepidium apetalum	2		4	11.6	13.8	15.7	13.9	14.1	13.82	5.45	7.91	2.46	5.51	5.59	0.08			0.0645161	0	0.102564	0.274098	0.110294	0.110294	0.0121649		-2.2046	-0.243155
5	Lactucatatarica	4	6	7	14.3	12.8	11.9	13.5	11.7	12.84	5.54	6.112	0.572	5.61	6.12	0.51			0.129032	0.25	0.179487	0.254661	0.203295	0.203295	0.0413289		-1.5931	-0.323869
6	5	31	24	39						50.42									1	1	1	1	1	1	0.27602	0.72398		-1.44641	1.44641	1.60944	0.898702	5
7
8

## Sheet: Daquan Forest plantations 15
Field vegetation questionnaire
Sample plot No： 11 Daquan Forest plantations Survey date： August 20th, 2021
E:106。19′36″ N:37◦58′58″ altitude： 1130m Quadrat：1 GPS time19：50
Serial number	Plant name	density	frequency	coverage	height（cm)						Aboveground biomass(g)			Underground biomass(g)			soil temperature	soil moisture
					1	2	3	4	5	averageheight	Envelope weight	Total dry weight	dry weight	Envelope weight	Total dry weight	dry weight			Relative abundance	Relativefrequency	Relativecoverage	Relativeheight	importance value	Pi	Pi^2	D=1-∑Pi^2	lnPi	PilnPi	H=-∑PilnPi	lnS	E=H/lnS	Patrick
1	Chenopodium glaucum	67	10	50	22.3	17.8	26.4	13.1	16.9	19.3	6.01	18.22	12.21	6.2	10.78	4.58	29.6	11.4	0.807229	0.555556	0.735294	0.137759	0.558959	0.558959	0.312436		-0.581679	-0.325135
2	Amaranthus retroflexus	6		3	25.2	31	29.8	23.1	40.6	29.94	5.97	8.46	2.49	6.85	7.7	0.85			0.0722892	0	0.0441176	0.213704	0.0825278	0.0825278	0.00681084		-2.49462	-0.205876
3	Portulaca oleracea	3	5	1	6	9.3	7.8	5.6	10.1	7.76	5.89	6.08	0.19	3.48	3.56	0.08			0.0361446	0.277778	0.0147059	0.055389	0.0960043	0.0960043	0.00921683		-2.34336	-0.224973
4	Artemisia scoparia	2		3	16.7	28.9	30.4	21.4	25.5	24.58	5.88	8.62	2.74	5.84	6.58	0.74			0.0240964	0	0.0441176	0.175446	0.060915	0.060915	0.00371064		-2.79828	-0.170457
5	Rorippa islandica	1	2	3	21.4	25.3	26.6	28.7	26.5	25.7	5.84	11.68	5.84	5.88	7.32	1.44			0.0120482	0.111111	0.0441176	0.18344	0.0876793	0.0876793	0.00768767		-2.43407	-0.213418
6	Calystegia hederacea Wall	4	1	8	36.7	35.4	31.9	29.6	30.5	32.82	13.45	21.25	7.8	13.44	19.654	6.214			0.0481928	0.0555556	0.117647	0.234261	0.113914	0.113914	0.0129764		-2.17231	-0.247457
7	6	83	18	68						140.1									1	1	1	1	1	1	0.352838	0.647162		-1.38731	1.38731	1.79176	0.774275	6
Field vegetation questionnaire
Sample plot No： 12 Daquan Forest plantations Survey date： August 20th, 2021
E:106。19′36″ N:37◦58′58″ altitude： 1130m Quadrat：2 GPS time19：50
Serial number	Plant name	density	frequency	coverage	height（cm)						Aboveground biomass(g)			Underground biomass(g)			soil temperature	soil moisture
					1	2	3	4	5	averageheight	Envelope weight	Total dry weight	dry weight	Envelope weight	Total dry weight	dry weight			Relative abundance	Relativefrequency	Relativecoverage	Relativeheight	importance value	Pi	Pi^2	D=1-∑Pi^2	lnPi	PilnPi	H=-∑PilnPi	lnS	E=H/lnS	Patrick
1	Chenopodium glaucum	10	8	24	34.5	36.4	31.9	24.7	28.6	31.22	13.82	27.9	14.08	13.71	14.07	0.36	25.6	11.3	0.526316	0.727273	0.571429	0.189419	0.503609	0.503609	0.253622		-0.685955	-0.345453
2	Echinochloa crusgalli	1	2	1	16.4	20.3	19.8	17.2	15.9	17.92	13.6	13.82	0.22	13.7	25.78	12.08			0.0526316	0.181818	0.0238095	0.108725	0.091746	0.091746	0.00841733		-2.38873	-0.219157
3	Kochia scoparia	2		8	56.8	61.3	66.9	59.4	58.3	60.54	13.45	16.23	2.78	13.44	13.74	0.3			0.105263	0	0.190476	0.36731	0.165762	0.165762	0.0274771		-1.7972	-0.297908
4	Rorippa islandica	2		4	16.9	24.3	21.5	25.7	22.9	22.26	5.44	17.04	11.6	5.45	10.14	4.69			0.105263	0	0.0952381	0.135056	0.0838894	0.0838894	0.00703743		-2.47826	-0.207899
5	Potentilla supina	1	1	3	15.8	16.2	17.4	18.2	18.7	17.26	13.71	16.25	2.54	13.56	13.77	0.21			0.0526316	0.0909091	0.0714286	0.10472	0.0799224	0.0799224	0.00638759		-2.5267	-0.20194
6	Lepidium apetalum	3		2	11.3	15.4	16.8	16.2	18.4	15.62	13.45	17.14	3.69	13.54	13.61	0.07			0.157895	0	0.047619	0.0947701	0.075071	0.075071	0.00563565		-2.58932	-0.194383
7	6	19	11	42						164.82									1	1	1	1	1	1	0.308577	0.691423		-1.46674	1.46674	1.79176	0.818603	6
8
9
10
Field vegetation questionnaire
Sample plot No： 13 Daquan Forest plantations Survey date： August 20th, 2021
E:106。19′36″ N:37◦58′58″ altitude： 1130m Quadrat：3 GPS time19：50
Serial number	Plant name	density	frequency	coverage	height（cm)						Aboveground biomass(g)			Underground biomass(g)			soil temperature	soil moisture
					1	2	3	4	5	averageheight	Envelope weight	Total dry weight	dry weight	Envelope weight	Total dry weight	dry weight			Relative abundance	Relativefrequency	Relativecoverage	Relativeheight	importance value	Pi	Pi^2	D=1-∑Pi^2	lnPi	PilnPi	H=-∑PilnPi	lnS	E=H/lnS	Patrick
1	Lactucatatarica	6	14	9	12.3	10.8	9.6	11.4	15.3	11.88	13.9	21.73	7.83	13.85	15.37	1.52	24.3	11.6	0.461538	0.736842	0.3	0.0794224	0.394451	0.394451	0.155591		-0.930261	-0.366942
2	Echinochloa crusgalli	1	1	13	77.6	101.3	98.7	85.6	42.3	81.1	13.77	35.97	22.2	13.65	19.02	5.37			0.0769231	0.0526316	0.433333	0.542185	0.276268	0.276268	0.0763241		-1.28638	-0.355387
3	Cynanchum chinense	2	3	2	37.6	38.2	19.2	25.7	21.4	28.42	13.72	15.3	1.58	13.68	14.56	0.88			0.153846	0.157895	0.0666667	0.189999	0.142102	0.142102	0.0201929		-1.95121	-0.27727
4	Taraxacum mongolicum	3	1	5	12.8	11.6	13.5	14.9	15.7	13.7	13.45	16.87	3.42	13.42	14.36	0.94			0.230769	0.0526316	0.166667	0.0915898	0.135414	0.135414	0.018337		-1.99942	-0.27075
5	Suaeda glauca Bunge	1		1	13.2	12.9	14.7	16.1	15.5	14.48	3.44	3.58	0.14	3.42	3.5	0.08			0.0769231	0	0.0333333	0.0968044	0.0517652	0.0517652	0.00267964		-2.96104	-0.153279
6	5	13	19	30						149.58									1	1	1	1	1	1	0.273125	0.726875		-1.42363	1.42363	1.60944	0.88455	5
Field vegetation questionnaire
Sample plot No： 14 Daquan Forest plantations Survey date： August 20th, 2021
E:106。19′36″ N:37◦58′58″ altitude： 1130m Quadrat：4 GPS time19：50
Serial number	Plant name	density	frequency	coverage	height（cm)						Aboveground biomass(g)			Underground biomass(g)			soil temperature	soil moisture
					1	2	3	4	5	averageheight	Envelope weight	Total dry weight	dry weight	Envelope weight	Total dry weight	dry weight			Relative abundance	Relativefrequency	Relativecoverage	Relativeheight	importance value	Pi	Pi^2	D=1-∑Pi^2	lnPi	PilnPi	H=-∑PilnPi	lnS	E=H/lnS	Patrick
1	Chenopodium glaucum	4	5	17	35.5	34.6	30.1	23.3	25.6	29.82	13.79			5.51			25.1	11.4	0.333333	0.555556	0.548387	0.195824	0.408275	0.408275	0.166688		-1.79163	-0.731477
2	Cynanchum chinense	2	1	3	32.7	39.6	25.4	20.6	23.2	28.3	14.66			5.54					0.166667	0.111111	0.0967742	0.713181	0.271933	0.271933	0.0739476		-2.6044	-0.708222
3	Lactucatatarica	3	2	4	5.4	7.2	8.2	6.8	7.7	7.06	14.09			3.52					0.25	0.222222	0.129032	0.00715174	0.152102	0.152102	0.0231349		-3.76641	-0.572877
4	Taraxacum mongolicum	2	1	6	11.2	18.1	17.5	19.2	18.3	16.86	13.63			13.61					0.166667	0.111111	0.193548	0.0703311	0.135414	0.135414	0.018337		-3.99883	-0.541499
5	Suaeda glauca Bunge	1		1	8.9	13.2	12.4	11.5	11.2	11.44	13.44			13.45					0.0833333	0	0.0322581	0.0135125	0.032276	0.032276	0.00104174		-6.86686	-0.221635
		12	9	31						93.48									1	1	1	1	1	1	0.28315	0.71685		-2.77571	2.77571	1.60944	1.72465	5
Sample plot No： 15 Daquan Forest plantations Survey date： August 20th, 2021
E:106。19′36″ N:37◦58′58″ altitude： 1130m Quadrat：5 GPS time19：50
Serial number	Plant name	density	frequency	coverage	height（cm)						Aboveground biomass(g)			Underground biomass(g)			soil temperature	soil moisture
					1	2	3	4	5	averageheight	Envelope weight	Total dry weight	dry weight	Envelope weight	Total dry weight	dry weight			Relative abundance	Relativefrequency	Relativecoverage	Relativeheight	importance value	Pi	Pi^2	D=1-∑Pi^2	lnPi	PilnPi	H=-∑PilnPi	lnS	E=H/lnS	Patrick
1	Chenopodium glaucum	10	8	18	44.1	28.4	22.1	21.7	22.3	27.72	13.95			13.57			24.8	12.4	0.555556	0.8	0.6	0.0924787	0.512009	0.562009	0.315854		-0.576238	-0.323851
2	Echinochloa crusgalli	1	1	1	16.8	20.3	21.4	18.9	19.7	19.42	15.28			7.31					0.0555556	0.1	0.0333333	0.602431	0.19783	0.11783	0.0138839		-2.13851	-0.251981
3	Chenopodium album	3		1	16.5	13.3	16.1	17.3	19.8	16.6	13.45			13.62					0.166667		0.0333333	0.128718	0.0821796	0.0621796	0.0038663		-2.77773	-0.172718
4	Rorippa islandica	1		3	15.6	18.3	20.5	18.7	19.9	18.6	15.15			15.26					0.0555556		0.1	0.147684	0.0758099	0.0758099	0.00574714		-2.57953	-0.195554
5	Calystegia hederacea Wall	2	1	2	26.2	24.3	28.4	20.8	31.6	26.26	14.62			14.53					0.111111	0.1	0.0666667	0.000160542	0.0694846	0.0894846	0.00800749		-2.41369	-0.215988
6	Kochia scoparia	1		5	45.2	51.1	45.9	58.3	52.6	50.62	13.45			13.95					0.0555556		0.166667	0.0285278	0.0626875	0.0926875	0.00859097		-2.37852	-0.220459
		18	10	30						159.22									1	1	1	1	1	1	0.355949	0.644051		-1.38055	1.38055	1.79176	0.7705	6
																									0.907312

## Sheet: Horticultural farm 20
Field vegetation questionnaire
Sample plot No： 16 Horticultural farm Survey date： August 20th, 2021
E:106。22′41″ N:38◦5′57″ altitude： 1170m Quadrat：1 GPS time6：06
Serial number	Plant name	density	frequency	coverage	height（cm)						Aboveground biomass(g)			Underground biomass(g)			soil temperature	soil moisture
					1	2	3	4	5	averageheight	Envelope weight	Total dry weight	dry weight	Envelope weight	Total dry weight	dry weight			Relative abundance	Relativefrequency	Relativecoverage	Relativeheight	importance value	Pi	Pi^2	D=1-∑Pi^2	lnPi	PilnPi	H=-∑PilnPi	lnS	E=H/lnS	Patrick
1	Ixeris chinensis	21	8	15	6.8	7.2	5.4	6.1	7.3	6.56	5.85	15.49	9.64	5.83	8.98	3.15	31.9	8.1	0.636364	0.470588	0.394737	0.0856173	0.396827	0.396827	0.157471		-0.924256	-0.366769
2	Chenopodium glaucum	7	8	16	7.8	8.1	8.9	9.2	8.3	8.46	3.42	11.55	8.13	3.45	15.41	11.96			0.212121	0.470588	0.421053	0.110415	0.303544	0.303544	0.0921391		-1.19223	-0.361894
3	Bassia dasyphylla	1		1	6.8	7.3	5.1	7.9	6.7	6.76	3.44	3.7	0.26	3.42	3.47	0.05			0.030303	0	0.0263158	0.0882276	0.0362116	0.0362116	0.00131128		-3.31838	-0.120164
4	Agropyron cristatum	3	1	5	15.8	16.3	12.7	18.4	15.6	15.76	15.45	16.8	1.35	15.41	16.4	0.99			0.0909091	0.0588235	0.131579	0.20569	0.12175	0.12175	0.0148232		-2.10578	-0.25638
5	Incarvillea sinensis	1		1	38.7	36.4	38.9	40.1	41.3	39.08	14.45	15.71	1.26	14.43	14.93	0.5			0.030303	0	0.0263158	0.51005	0.141667	0.141667	0.0200696		-1.95428	-0.276857
6	5	33	17	38						76.62									1	1	1	1	1	1	0.285814	0.714186		-1.38206	1.38206	1.60944	0.858724	5
7
8
9
Field vegetation questionnaire
Sample plot No： 17 Horticultural farm Survey date： August 20th, 2021
E:106。22′41″ N:38◦5′57″ altitude： 1170m Quadrat：2 GPS time6：06
Serial number	Plant name	density	frequency	coverage	height（cm)						Aboveground biomass(g)			Underground biomass(g)			soil temperature	soil moisture
					1	2	3	4	5	averageheight	Envelope weight	Total dry weight	dry weight	Envelope weight	Total dry weight	dry weight			Relative abundance	Relativefrequency	Relativecoverage	Relativeheight	importance value	Pi	Pi^2	D=1-∑Pi^2	lnPi	PilnPi	H=-∑PilnPi	lnS	E=H/lnS	Patrick
1	Ixeris chinensis	2	19	1	6	7.3	8.1	7.8	5.1	6.86	3.37	4.94	1.57	3.44	4.2	0.76	31.9	9.9	0.0869565	0.575758	0.0138889	0.0638853	0.185122	0.185122	0.0342702		-1.68674	-0.312253
2	Chenopodium glaucum	14	13	59	18.3	24.5	29.2	35.6	28.7	27.26	5.99	34.41	28.42	3.5	3.71	0.21			0.608696	0.393939	0.819444	0.253865	0.518986	0.518986	0.269347		-0.655878	-0.340392
3	Inula salsoloides	1		1	13.4	7.2	8.9	9.1	10.6	9.84	3.4	7.02	3.62	3.42	4.15	0.73			0.0434783	0	0.0138889	0.0916372	0.0372511	0.0372511	0.00138764		-3.29007	-0.122559
4	Glycyrrhiza uralensis Fisch	3		2	26.5	31.4	29.9	24.8	25.7	27.66	14.45	44.63	30.18	14.43	40.14	25.71			0.130435	0	0.0277778	0.25759	0.103951	0.103951	0.0108057		-2.26384	-0.235327
5	Cynanchum chinense	3	1	9	24.5	45.3	38.7	36.4	33.9	35.76	13.44	17.45	4.01	13.45	18.11	4.66			0.130435	0.030303	0.125	0.333023	0.15469	0.15469	0.0239291		-1.86633	-0.288703
6	5	23	33	72						107.38									1	1	1	1	1	1	0.339739	0.660261		-1.29923	1.29923	1.60944	0.807259	5
7
8
Field vegetation questionnaire
Sample plot No：18 Horticultural farm Survey date： August 20th, 2021
E:106。22′41″ N:38◦5′57″ altitude： 1170m Quadrat：3 GPS time6：06
Serial number	Plant name	density	frequency	coverage	height（cm)						Aboveground biomass(g)			Underground biomass(g)			soil temperature	soil moisture
					1	2	3	4	5	averageheight	Envelope weight	Total dry weight	dry weight	Envelope weight	Total dry weight	dry weight			Relative abundance	Relativefrequency	Relativecoverage	Relativeheight	importance value	Pi	Pi^2	D=1-∑Pi^2	lnPi	PilnPi	H=-∑PilnPi	lnS	E=H/lnS	Patrick
1	Ixeris chinensis	4	7	3	6.1	5.9	7.1	8.5	10.3	7.58	3.38	4.88	1.5	3.39	3.69	0.3	30.9	2.9	0.333333	0.28	0.272727	0.161414	0.261869	0.261869	0.0685752		-1.33991	-0.350881
2	Sophora alopecuroides	1		1	7.6	5.4	8.3	9.1	8.5	7.78	3.43	3.85	0.42	3.49	4.6	1.11			0.0833333	0	0.0909091	0.165673	0.0849788	0.0849788	0.0072214		-2.46535	-0.209503
3	Chenopodium glaucum	3	15	6	20	18.9	17.3	20.1	13.2	17.9	3.36	3.95	0.59	3.46	15.94	12.48			0.25	0.6	0.545455	0.381175	0.444158	0.444158	0.197276		-0.811576	-0.360468
4	Phragmites australis	4	3	1	9.5	7.3	18.7	17.6	15.4	13.7	3.46	5.83	2.37	3.4	4.11	0.71			0.333333	0.12	0.0909091	0.291738	0.208995	0.208995	0.0436789		-1.56544	-0.32717
5	4	12	25	11						46.96									1	1	1	1	1	1	0.316751	0.683249		-1.24802	1.24802	1.38629	0.900257	4
6
7
Field vegetation questionnaire
Sample plot No： 19 Horticultural farm Survey date： August 20th, 2021
E:106。22′41″ N:38◦5′57″ altitude： 1170m Quadrat：4 GPS time6：06
Serial number	Plant name	density	frequency	coverage	height（cm)						Aboveground biomass(g)			Underground biomass(g)			soil temperature	soil moisture
					1	2	3	4	5	averageheight	Envelope weight	Total dry weight	dry weight	Envelope weight	Total dry weight	dry weight			Relative abundance	Relativefrequency	Relativecoverage	Relativeheight	importance value	Pi	Pi^2	D=1-∑Pi^2	lnPi	PilnPi	H=-∑PilnPi	lnS	E=H/lnS	Patrick
1	Ixeris chinensis	24	20	32	5.4	6.8	5.4	6.1	7.1	6.16	6.04	17.2	11.16	3.45	8.57	5.12	31.4	8.9	0.705882	0.588235	0.666667	0.110752	0.517884	0.517884	0.268204		-0.658004	-0.34077
2	Chenopodium glaucum	4	12	4	6.1	8.3	12.6	15.7	18.2	12.18	3.49	4.78	1.29	3.47	4.8	1.33			0.117647	0.352941	0.0833333	0.218986	0.193227	0.193227	0.0373366		-1.64389	-0.317644
3	Digitaria sanguinalis	1		3	11.1	9.6	14.1	8.3	9.1	10.44	3.5	4.37	0.87	3.39	4.84	1.45			0.0294118	0	0.0625	0.187702	0.0699035	0.0699035	0.0048865		-2.66064	-0.185988
4	Artemisia scoparia	5	2	9	19.6	27.3	39.8	26.4	21.1	26.84	13.44	19.84	6.4	13.45	16.11	2.66			0.147059	0.0588235	0.1875	0.48256	0.218986	0.218986	0.0479547		-1.51875	-0.332584
5	4	34	34	48						55.62									1	1	1	1	1	1	0.358382	0.641618		-1.17699	1.17699	1.38629	0.849016	4
6
7
8
Field vegetation questionnaire
Sample plot No： 20 Horticultural farm Survey date： August 20th, 2021
E:106。22′41″ N:38◦5′57″ altitude： 1170m Quadrat：5 GPS time6：06
Serial number	Plant name	density	frequency	coverage	height（cm)						Aboveground biomass(g)			Underground biomass(g)			soil temperature	soil moisture
					1	2	3	4	5	averageheight	Envelope weight	Total dry weight	dry weight	Envelope weight	Total dry weight	dry weight			Relative abundance	Relativefrequency	Relativecoverage	Relativeheight	importance value	Pi	Pi^2	D=1-∑Pi^2	lnPi	PilnPi	H=-∑PilnPi	lnS	E=H/lnS	Patrick
1	Setariaviridis	10	5	12	13.7	12.6	8.7	10.4	10.6	11.2	5.97	25.22	19.25	7.56	22.87	15.31	28.6	8.3	0.454545	0.192308	0.521739	0.120924	0.322379	0.322379	0.103928		-1.13203	-0.364942
2	Chenopodium glaucum	7	19	5	7.8	11.3	13.6	9.7	8.5	10.18	3.43	5.01	1.58	3.46	4.88	1.42			0.318182	0.730769	0.217391	0.109911	0.344063	0.344063	0.11838		-1.06693	-0.367091
3	Heteropappus altaicus	2	1	2	35.6	32.4	37.6	38.1	34.9	35.72	14.45	22.13	7.68	14.41	16.47	2.06			0.0909091	0.0384615	0.0869565	0.385662	0.150497	0.150497	0.0226494		-1.89381	-0.285013
4	Glycyrrhiza uralensis Fisch	2	1	1	22.4	21.8	26.5	28.7	24.3	24.74	5.45	25.47	20.02	5.44	22.39	16.95			0.0909091	0.0384615	0.0434783	0.267113	0.10999	0.10999	0.0120979		-2.20736	-0.242789
5	Sophora alopecuroides	1		3	8.9	11.3	10.4	9.6	13.7	10.78	3.43	3.89	0.46	3.44	4.6	1.16			0.0454545	0	0.130435	0.11639	0.0730697	0.0730697	0.00533918		-2.61634	-0.191175
6	5	22	26	23						92.62									1	1	1	1	1	1	0.262394	0.737606		-1.45101	1.45101	1.60944	0.901564	5
7
8

## Sheet: Daqin 25
Field vegetation questionnaire
Sample plot No： 21 Daqin Survey date： August 21th, 2021
E:106。20′11″ N:38◦7′54″ altitude： 1120m Quadrat：1 GPS time9：03
Serial number	Plant name	density	frequency	coverage	height（cm)						Aboveground biomass(g)			Underground biomass(g)			soil temperature	soil moisture
					1	2	3	4	5	averageheight	Envelope weight	Total dry weight	dry weight	Envelope weight	Total dry weight	dry weight			Relative abundance	Relativefrequency	Relativecoverage	Relativeheight	importance value	Pi	Pi^2	D=1-∑Pi^2	lnPi	PilnPi	H=-∑PilnPi	lnS	E=H/lnS	Patrick
1	Portulaca oleracea	15	3	19	16.4	12.1	13.4	17.9	15.6	15.08	13.49	19.01	5.52	5.85	25.48	19.63	18.6	33.8	0.517241	0.1875	0.279412	0.152879	0.284258	0.284258	0.0808027		-1.25787	-0.35756
2	Calystegia hederacea Wall	8	11	7	25.3	14.7	15.7	23.4	21.9	20.2	13.56	15.91	2.35	5.82	7.93	2.11			0.275862	0.6875	0.102941	0.204785	0.317772	0.317772	0.100979		-1.14642	-0.364301
3	Rorippa islandica	2	2	10	18.4	20.6	21.6	20.3	16.3	19.44	13.47	29.07	15.6	5.7	10.62	4.92			0.0689655	0.125	0.147059	0.19708	0.134526	0.134526	0.0180973		-2.006	-0.269859
4	Polygonum aviculare	3		16	23.8	19.6	21.1	22.7	15.4	20.52	13.72	19.64	5.92	5.63	6.12	0.49			0.103448	0	0.235294	0.208029	0.136693	0.136693	0.0186849		-1.99002	-0.272021
5	Lappula heteracantha	1		16	21.6	25.4	23.8	25.3	20.9	23.4	13.45	25.76	12.31	13.22	14.63	1.41			0.0344828	0	0.235294	0.237226	0.126751	0.126751	0.0160658		-2.06553	-0.261808
6	5	29	16	68						98.64									1	1	1	1	1	1	0.23463	0.76537		-1.52555	1.52555	1.60944	0.947877	5
7
Field vegetation questionnaire
Sample plot No： 22 Daqin Survey date： August 21th, 2021
E:106。20′11″ N:38◦7′54″ altitude： 1120m Quadrat：2 GPS time9：03
Serial number	Plant name	density	frequency	coverage	height（cm)						Aboveground biomass(g)			Underground biomass(g)			soil temperature	soil moisture
					1	2	3	4	5	averageheight	Envelope weight	Total dry weight	dry weight	Envelope weight	Total dry weight	dry weight			Relative abundance	Relativefrequency	Relativecoverage	Relativeheight	importance value	Pi	Pi^2	D=1-∑Pi^2	lnPi	PilnPi	H=-∑PilnPi	lnS	E=H/lnS	Patrick
1	Lepidium apetalum	12	39	12	17.8	16.8	15.9	21.4	20.6	18.5	13.71	26.94	13.23	13.46	13.69	0.23	19.6	33.7	0.413793	0.661017	0.181818	0.19299	0.362405	0.362405	0.131337		-1.01499	-0.367838
2	Calystegia hederacea Wall	11	12	38	43.4	39.3	30.4	29.7	53.2	39.2	13.78	35.9	22.12	3.49	20.78	17.29			0.37931	0.20339	0.575758	0.40893	0.391847	0.391847	0.153544		-0.936884	-0.367115
3	Potentilla supina	3	4	11	21.4	19.7	28.6	25.6	23.1	23.68	13.44	21.54	8.1	13.68	14.01	0.33			0.103448	0.0677966	0.166667	0.247027	0.146235	0.146235	0.0213846		-1.92254	-0.281142
4	Taraxacum mongolicum	3	4	5	10.6	15.4	13.8	16.7	15.9	14.48	13.58	17.12	3.54	13.29	14.45	1.16			0.103448	0.0677966	0.0757576	0.151054	0.099514	0.099514	0.00990304		-2.30746	-0.229624
5	4	29	59	66						95.86									1	1	1	1	1	1	0.316169	0.683831		-1.24572	1.24572	1.38629	0.898597	4
6
7
Field vegetation questionnaire
Sample plot No： 23 Daqin Survey date： August 21th, 2021
E:106。20′11″ N:38◦7′54″ altitude： 1120m Quadrat：3 GPS time9：03
Serial number	Plant name	density	frequency	coverage	height（cm)						Aboveground biomass(g)			Underground biomass(g)			soil temperature	soil moisture
					1	2	3	4	5	averageheight	Envelope weight	Total dry weight	dry weight	Envelope weight	Total dry weight	dry weight			Relative abundance	Relativefrequency	Relativecoverage	Relativeheight	importance value	Pi	Pi^2	D=1-∑Pi^2	lnPi	PilnPi	H=-∑PilnPi	lnS	E=H/lnS	Patrick
1	Lepidium apetalum	25	14	14	15.8	17.1	14.9	20.1	19.6	17.5	13.72	41.22	27.5	13.45	13.84	0.39	19.7	31.1	0.625	0.518519	0.25	0.182482	0.394	0.394	0.155236		-0.931404	-0.366973
2	Potentilla supina	2		12	31.6	19.9	22.4	28.3	29.7	26.38	13.9	19.31	5.41	13.72	13.95	0.23			0.05	0	0.214286	0.275078	0.134841	0.134841	0.0181821		-2.00366	-0.270175
3	Portulaca oleracea	3	11	9	31.2	16.3	21.6	12.4	17.6	19.82	13.75	21.02	7.27	3.4	15	11.6			0.075	0.407407	0.160714	0.206674	0.212449	0.212449	0.0451345		-1.54905	-0.329095
4	Lactucatatarica	5		3	5.3	7.4	8.1	4.9	9.6	7.06	13.51	14.23	0.72	3.42	4.02	0.6			0.125	0	0.0535714	0.0736184	0.0630474	0.0630474	0.00397498		-2.76387	-0.174255
5	Calystegia hederacea Wall	5	2	18	28.3	26.1	22.1	23.4	25.8	25.14	13.76	20.64	6.88	3.34	5.75	2.41			0.125	0.0740741	0.321429	0.262148	0.195663	0.195663	0.0382839		-1.63136	-0.319197
6	5	40	27	56						95.9									1	1	1	1	1	1	0.260812	0.739188		-1.4597	1.4597	1.60944	0.90696	5
Field vegetation questionnaire
Sample plot No： 24 Daqin Survey date： August 21th, 2021
E:106。20′11″ N:38◦7′54″ altitude： 1120m Quadrat：4 GPS time9：03
Serial number	Plant name	density	frequency	coverage	height（cm)						Aboveground biomass(g)			Underground biomass(g)			soil temperature	soil moisture
					1	2	3	4	5	averageheight	Envelope weight	Total dry weight	dry weight	Envelope weight	Total dry weight	dry weight			Relative abundance	Relativefrequency	Relativecoverage	Relativeheight	importance value	Pi	Pi^2	D=1-∑Pi^2	lnPi	PilnPi	H=-∑PilnPi	lnS	E=H/lnS	Patrick
1	Potentilla supina	3	1	10	21.4	19.6	25.4	22.9	27.3	23.32	13.77	19.16	5.39	13.47	13.81	0.34	20.3	29.8	0.1	0.0588235	0.15625	0.184728	0.12495	0.12495	0.0156126		-2.07984	-0.259876
2	Lepidium apetalum	8	6	4	16.7	9.6	13.8	18.3	11.4	13.96	13.48	27.34	13.86	13.52	13.95	0.43			0.266667	0.352941	0.0625	0.110583	0.198173	0.198173	0.0392724		-1.61862	-0.320766
3	Echinops gmelini	1	2	15	11.3	14.5	10.8	16.7	18.9	14.44	13.96	14.89	0.93	13.27	13.71	0.44			0.0333333	0.117647	0.234375	0.114385	0.124935	0.124935	0.0156088		-2.07996	-0.25986
4	Phragmites australis	4		8	34.5	37.8	17.6	25.4	42.1	31.48	5.47	7.78	2.31	3.38	7.23	3.85			0.133333	0	0.125	0.249366	0.126925	0.126925	0.0161099		-2.06416	-0.261993
5	Portulaca oleracea	10	5	15	15.4	13.4	12.1	15.6	11.4	13.58	13.58	23.42	9.84	3.45	44.22	40.77			0.333333	0.294118	0.234375	0.107573	0.24235	0.24235	0.0587334		-1.41737	-0.3435
6	Calystegia hederacea Wall	4	3	12	28.9	32.1	26.7	24.6	35	29.46	13.4	15.16	1.76	3.91	7.81	3.9			0.133333	0.176471	0.1875	0.233365	0.182667	0.182667	0.0333673		-1.70009	-0.310551
7	6	30	17	64						126.24									1	1	1	1	1	1	0.178704	0.821296		-1.75655	1.75655	1.79176	0.980347	6
8
9
10
Field vegetation questionnaire
Sample plot No： 25 Daqin Survey date： August 21th, 2021
E:106。20′11″ N:38◦7′54″ altitude： 1120m Quadrat：5 GPS time9：03
Serial number	Plant name	density	frequency	coverage	height（cm)						Aboveground biomass(g)			Underground biomass(g)			soil temperature	soil moisture
					1	2	3	4	5	averageheight	Envelope weight	Total dry weight	dry weight	Envelope weight	Total dry weight	dry weight			Relative abundance	Relativefrequency	Relativecoverage	Relativeheight	importance value	Pi	Pi^2	D=1-∑Pi^2	lnPi	PilnPi	H=-∑PilnPi	lnS	E=H/lnS	Patrick
1	Rumex acetosa	1		16	48.7	52.3	49.6	55.9	50.1	51.32	13.71	49.48	35.77	13.46	29.59	16.13	19.8	37.8	0.0434783	0	0.285714	0.355156	0.171087	0.171087	0.0292708		-1.76558	-0.302068
2	Taraxacum mongolicum	4	3	7	11.6	20.1	17.8	19.4	18.3	17.44	13.95	18.61	4.66	15.28	16.75	1.47			0.173913	0.130435	0.125	0.120692	0.13751	0.13751	0.018909		-1.98406	-0.272828
3	Salsola collina	1	1	3	14.7	13.6	15.2	16.8	14.9	15.04	13.64	14.78	1.14	13.43	13.76	0.33			0.0434783	0.0434783	0.0535714	0.104083	0.0611527	0.0611527	0.00373966		-2.79438	-0.170884
4	Portulaca oleracea	3	13	7	10.1	16.2	18.7	24.3	21.2	18.1	3.47	7	3.53	3.39	8.13	4.74			0.130435	0.565217	0.125	0.12526	0.236478	0.236478	0.0559218		-1.4419	-0.340978
5	Calystegia hederacea Wall	11	4	21	43.4	37.6	19.8	21.2	16.7	27.74	5.25	13.44	8.19	3.44	13.92	10.48			0.478261	0.173913	0.375	0.191972	0.304787	0.304787	0.0928948		-1.18814	-0.36213
6	Suaeda glauca Bunge	3	2	2	16.1	14.3	15.7	14.9	13.3	14.86	5.28	5.5	0.22	3.47	3.59	0.12			0.130435	0.0869565	0.0357143	0.102837	0.0889857	0.0889857	0.00791846		-2.41928	-0.215281
7	6	23	23	56						144.5									1	1	1	1	1	1	0.208655	0.791345		-1.66417	1.66417	1.79176	0.928791	6
8
9
10

## Sheet: Linsenjun 30
Field vegetation questionnaire
Sample plot No： 26 Linsenjun Survey date： August 21th, 2021
E:106。21′14″ N:38◦9′32″ altitude： 1120m Quadrat：1 GPS time10：47
Serial number	Plant name	density	frequency	coverage	height（cm)						Aboveground biomass(g)			Underground biomass(g)			soil temperature	soil moisture
					1	2	3	4	5	averageheight	Envelope weight	Total dry weight	dry weight	Envelope weight	Total dry weight	dry weight			Relative abundance	Relativefrequency	Relativecoverage	Relativeheight	importance value	Pi	Pi^2	D=1-∑Pi^2	lnPi	PilnPi	H=-∑PilnPi	lnS	E=H/lnS	Patrick
1	Ixeris chinensis	53	16	74	17.1	14.5	16.8	19.8	20.1	17.66	15.39	56.07	40.68	3.44	10.2	6.76	19.8	15.6	0.679487	0.666667	0.596774	0.121642	0.516143	0.516143	0.266403		-0.661372	-0.341362
2	Chenopodium glaucum	1	2	3	17.5	19.5	20.1	23.4	25.6	21.22	3.46	3.79	0.33	3.47	6.21	2.74			0.0128205	0.0833333	0.0241935	0.146163	0.0666277	0.0666277	0.00443925		-2.70863	-0.18047
3	Rumex acetosa	1		14	41.5	58.9	55.4	62.3	65.8	56.78	13.45	49.18	35.73	13.44	29.57	16.13			0.0128205	0	0.112903	0.391101	0.129206	0.129206	0.0166942		-2.04635	-0.2644
4	Amaranthus retroflexus	5	4	11	22.4	28.9	26.7	30.1	24.9	26.6	5.69	7.81	2.12	5.97	6.69	0.72			0.0641026	0.166667	0.0887097	0.183221	0.125675	0.125675	0.0157942		-2.07406	-0.260657
5	Artemisia argyi	11		9	4.7	8.3	5.2	6.4	2.3	5.38	3.49	5.51	2.02	3.51	4.27	0.76			0.141026	0	0.0725806	0.0370574	0.0626659	0.0626659	0.00392702		-2.76994	-0.173581
6	Taraxacum mongolicum	7	2	13	12.7	16.8	15.9	20.4	21.9	17.54	13.71	20.87	7.16	13.45	15.74	2.29			0.0897436	0.0833333	0.104839	0.120816	0.0996828	0.0996828	0.00993666		-2.30576	-0.229845
7	6	78	24	124						145.18									1	1	1	1	1	1	0.317194	0.682806		-1.45032	1.45032	1.79176	0.809436	6
Field vegetation questionnaire
Sample plot No： 27 Linsenjun Survey date： August 21th, 2021
E:106。21′14″ N:38◦9′32″ altitude： 1120m Quadrat：2 GPS time10：47
Serial number	Plant name	density	frequency	coverage	height（cm)						Aboveground biomass(g)			Underground biomass(g)			soil temperature	soil moisture
					1	2	3	4	5	averageheight	Envelope weight	Total dry weight	dry weight	Envelope weight	Total dry weight	dry weight			Relative abundance	Relativefrequency	Relativecoverage	Relativeheight	importance value	Pi	Pi^2	D=1-∑Pi^2	lnPi	PilnPi	H=-∑PilnPi	lnS	E=H/lnS	Patrick
1	Setariaviridis	5	3	4	17.6	12.3	15.8	26.4	25.8	19.58	5.52	12.91	7.39	5.51	10.19	4.68	19.2	16	0.217391	0.103448	0.0689655	0.223414	0.153305	0.153305	0.0235024		-1.87533	-0.287497
2	Portulaca oleracea	3	6	34	30.1	28.6	25.6	27.4	15.4	25.42	15.83	57.75	41.92	5.54	8.33	2.79			0.130435	0.206897	0.586207	0.29005	0.303397	0.303397	0.0920498		-1.19271	-0.361866
3	Ixeris chinensis	5	11	5	19.8	12.3	11.2	13.4	16.7	14.68	3.49	6.21	2.72	3.52	4.35	0.83			0.217391	0.37931	0.0862069	0.167503	0.212603	0.212603	0.0452		-1.54833	-0.329179
4	Echinochloa crusgalli	4	5	4	16.8	20.3	21.4	18.9	19.7	19.42	13.45	14.36	0.91	13.61	61.14	47.53			0.173913	0.172414	0.0689655	0.221588	0.15922	0.15922	0.0253511		-1.83747	-0.292562
5	Agropyron cristatum	6	4	11	5.6	8.7	9.4	8.7	10.3	8.54	13.23	14.13	0.9	13.45	14.17	0.72			0.26087	0.137931	0.189655	0.0974441	0.171475	0.171475	0.0294037		-1.76332	-0.302365
6	5	23	29	58						87.64						0			1	1	1	1	1	1	0.215507	0.784493		-1.57347	1.57347	1.60944	0.977651	5
7																0
																0
Field vegetation questionnaire
Sample plot No： 28 Linsenjun Survey date： August 21th, 2021
E:106。21′14″ N:38◦9′32″ altitude： 1120m Quadrat：3 GPS time10：47
Serial number	Plant name	density	frequency	coverage	height（cm)						Aboveground biomass(g)			Underground biomass(g)			soil temperature	soil moisture
					1	2	3	4	5	averageheight	Envelope weight	Total dry weight	dry weight	Envelope weight	Total dry weight	dry weight			Relative abundance	Relativefrequency	Relativecoverage	Relativeheight	importance value	Pi	Pi^2	D=1-∑Pi^2	lnPi	PilnPi	H=-∑PilnPi	lnS	E=H/lnS	Patrick
1	Malva crispa	1		2	25.4	20.6	17.8	18.6	19.3	20.34	5.37	13.74	8.37	3.5	5.25	1.75	19.9	17.5	0.0294118	0	0.0625	0.269833	0.0904362	0.0904362	0.0081787		-2.40311	-0.217328
2	Lepidium apetalum	22	14	12	11.3	10.6	8.5	10.4	9.8	10.12	5.35	23.66	18.31	3.72	4.48	0.76			0.647059	0.608696	0.375	0.134253	0.441252	0.441252	0.194703		-0.818139	-0.361006
3	Portulaca oleracea	2		3	16.5	17.2	22.1	23.4	19.2	19.68	5.38	10.2	4.82	3.39	4.9	1.51			0.0588235	0	0.09375	0.261077	0.103413	0.103413	0.0106942		-2.26903	-0.234646
4	Ixeris chinensis	6	8	6	11.2	15.6	14.6	12.3	15.8	13.9	3.5	5.69	2.19	3.49	4.06	0.57			0.176471	0.347826	0.1875	0.184399	0.224049	0.224049	0.0501979		-1.49589	-0.335153
5	Suaeda glauca Bunge	3	1	9	8.9	12.6	13.4	10.5	11.3	11.34	15.45	40.9	25.45	15.1	23.72	8.62			0.0882353	0.0434783	0.28125	0.150438	0.14085	0.14085	0.0198388		-1.96006	-0.276075
6	5	34	23	32						75.38						0			1	1	1	1	1	1	0.283613	0.716387		-1.42421	1.42421	1.60944	0.88491	5
7																0
																0
Field vegetation questionnaire
Sample plot No： 29 Linsenjun Survey date： August 21th, 2021
E:106。21′14″ N:38◦9′32″ altitude： 1120m Quadrat：4 GPS time10：47
Serial number	Plant name	density	frequency	coverage	height（cm)						Aboveground biomass(g)			Underground biomass(g)			soil temperature	soil moisture
					1	2	3	4	5	averageheight	Envelope weight	Total dry weight	dry weight	Envelope weight	Total dry weight	dry weight			Relative abundance	Relativefrequency	Relativecoverage	Relativeheight	importance value	Pi	Pi^2	D=1-∑Pi^2	lnPi	PilnPi	H=-∑PilnPi	lnS	E=H/lnS	Patrick
1	Chenopodium glaucum	3	3	33	28.6	23.4	21.2	23.6	24.5	24.26	14.1	44.26	30.16	5.34	17.05	11.71	19.8	13.5	0.115385	0.111111	0.485294	0.194142	0.226483	0.226483	0.0512945		-1.48509	-0.336347
2	Lactucatatarica	6	14	16	14.5	16.3	11.3	15.7	14.3	14.42	5.56	11.23	5.67	3.52	5.29	1.77			0.230769	0.518519	0.235294	0.115397	0.274995	0.274995	0.0756221		-1.291	-0.355019
3	Lepidium apetalum	12	10	8	8.3	6.7	9.2	4.7	7.8	7.34	3.62	10.92	7.3	3.44	3.71	0.27			0.461538	0.37037	0.117647	0.0587388	0.252074	0.252074	0.0635411		-1.37803	-0.347366
4	Plantago asiatica	3		5	35.8	42.1	39.9	44.7	31.2	38.74	15.45	17.15	1.7	15.4	17.8	2.4			0.115385	0	0.0735294	0.310019	0.124733	0.124733	0.0155584		-2.08158	-0.259642
5	Solanum nigrum	2		6	36.7	41.5	38.9	44.3	39.6	40.2	15.45	43.51	28.06	15.41	20.51	5.1			0.0769231	0	0.0882353	0.321703	0.121715	0.121715	0.0148146		-2.10607	-0.256341
6	5	26	27	68						124.96						0			1	1	1	1	1	1	0.220831	0.779169		-1.55471	1.55471	1.60944	0.965999	5
7																0
																0
Field vegetation questionnaire
Sample plot No： 30 Linsenjun Survey date： August 21th, 2021
E:106。21′14″ N:38◦9′32″ altitude： 1120m Quadrat：5 GPS time10：47
Serial number	Plant name	density	frequency	coverage	height（cm)						Aboveground biomass(g)			Underground biomass(g)			soil temperature	soil moisture
					1	2	3	4	5	averageheight	Envelope weight	Total dry weight	dry weight	Envelope weight	Total dry weight	dry weight			Relative abundance	Relativefrequency	Relativecoverage	Relativeheight	importance value	Pi	Pi^2	D=1-∑Pi^2	lnPi	PilnPi	H=-∑PilnPi	lnS	E=H/lnS	Patrick
1	Portulaca oleracea	4	7	15	13.2	12.8	11.7	10.8	11.6	12.02	14.88	40.03	25.15	3.45	6.31	2.86	19.5	14.6	0.235294	0.159091	0.535714	0.227911	0.289502	0.289502	0.0838117		-1.23959	-0.358865
2	Lepidium apetalum	10	37	7	5.7	6.2	4.8	3.9	7.1	5.54	3.46	5.69	2.23	3.39	4.06	0.67			0.588235	0.840909	0.25	0.105044	0.446047	0.446047	0.198958		-0.807331	-0.360108
3	Setariaviridis	1		1	14.2	12.8	13.9	15.7	13.2	13.96	3.41	4.46	1.05	3.44	6.67	3.23			0.0588235	0	0.0357143	0.264695	0.0898081	0.0898081	0.0080655		-2.41008	-0.216445
4	Malva crispa	2		5	19.6	21.3	25.4	20.7	19.1	21.22	3.45	8.9	5.45	3.44	4.9	1.46			0.117647	0	0.178571	0.402351	0.174642	0.174642	0.0305		-1.74501	-0.304754
5	4	17	44	28						52.74									1	1	1	1	1	1	0.321335	0.678665		-1.24017	1.24017	1.38629	0.894594	4
6
7

## Sheet: Ningliubao 35
Field vegetation questionnaire
Sample plot No： 31 Ningliubao Survey date： August 21th, 2021
E:106。20′38″ N:38◦11′8″ altitude： 1110m Quadrat：1 GPS time12：27
Serial number	Plant name	density	frequency	coverage	height（cm)						Aboveground biomass(g)			Underground biomass(g)			soil temperature	soil moisture
					1	2	3	4	5	averageheight	Envelope weight	Total dry weight	dry weight	Envelope weight	Total dry weight	dry weight			Relative abundance	Relativefrequency	Relativecoverage	Relativeheight	importance value	Pi	Pi^2	D=1-∑Pi^2	lnPi	PilnPi	H=-∑PilnPi	lnS	E=H/lnS	Patrick
1	Ixeris chinensis	6	6	16	7.8	10.5	6.4	5.7	7.6	7.6	5.33	10.71	5.38	3.45	5.99	2.54	20.8	29.9	0.315789	0.352941	0.390244	0.0845572	0.285883	0.285883	0.0817291		-1.25217	-0.357975
2	Chenopodium glaucum	6	1	11	19.5	34.3	28.7	6.5	14.6	20.72	5.15	10.12	4.97	3.42	9.66	6.24			0.315789	0.0588235	0.268293	0.23053	0.218359	0.218359	0.0476806		-1.52162	-0.332258
3	Portulaca oleracea	3	8	3	21.3	20.8	16.7	19.2	18.4	19.28	5.26	8.88	3.62	3.52	3.93	0.41			0.157895	0.470588	0.0731707	0.214508	0.22904	0.22904	0.0524595		-1.47386	-0.337573
4	Rorippa islandica	1		4	17.6	19.8	21.3	20.9	18.4	19.6	13.47	20.77	7.3	13.26	18.14	4.88			0.0526316	0	0.097561	0.218069	0.0920653	0.0920653	0.00847601		-2.38526	-0.219599
5	Amaranthus retroflexus	3	2	7	21.6	23.4	20.9	24.8	22.7	22.68	13.28	14.55	1.27	13.44	13.87	0.43			0.157895	0.117647	0.170732	0.252336	0.174652	0.174652	0.0305035		-1.74496	-0.304761
6	5	19	17	41						89.88									1	1	1	1	1	1	0.220849	0.779151		-1.55217	1.55217	1.60944	0.964415	5
7
Field vegetation questionnaire
Sample plot No： 32 Ningliubao Survey date： August 21th, 2021
E:106。20′38″ N:38◦11′8″ altitude： 1110m Quadrat：2 GPS time12：27
Serial number	Plant name	density	frequency	coverage	height（cm)						Aboveground biomass(g)			Underground biomass(g)			soil temperature	soil moisture
					1	2	3	4	5	averageheight	Envelope weight	Total dry weight	dry weight	Envelope weight	Total dry weight	dry weight			Relative abundance	Relativefrequency	Relativecoverage	Relativeheight	importance value	Pi	Pi^2	D=1-∑Pi^2	lnPi	PilnPi	H=-∑PilnPi	lnS	E=H/lnS	Patrick
1	Lactucatatarica	19	13	33	15.4	13.8	10.9	7.6	8.1	11.16	13.45	30.49	17.04	3.49	9.95	6.46	20.8	27.9	0.655172	0.764706	0.622642	0.13462	0.544285	0.544285	0.296246		-0.608282	-0.331079
2	Calystegia hederacea Wall	4	2	10	28.7	31.4	24.6	20.8	25.9	26.28	13.4	17	3.6	3.45	7.25	3.8			0.137931	0.117647	0.188679	0.317008	0.190316	0.190316	0.0362203		-1.65907	-0.315748
3	Echinochloa crusgalli	4	2	5	16.9	20.5	18.7	21.3	19.6	19.4	13.46	14.41	0.95	13.51	23.79	10.28			0.137931	0.117647	0.0943396	0.234017	0.145984	0.145984	0.0213112		-1.92426	-0.280911
4	Cynanchum chinense	2		5	26.8	27.2	25.4	31.5	19.4	26.06	5.46	7.84	2.38	5.47	8.66	3.19			0.0689655	0	0.0943396	0.314355	0.119415	0.119415	0.0142599		-2.12515	-0.253775
5	4	29	17	53						82.9									1	1	1	1	1	1	0.368038	0.631962		-1.18151	1.18151	1.38629	0.852281	4
6
7
Field vegetation questionnaire
Sample plot No：33 Ningliubao Survey date： August 21th, 2021
E:106。20′38″ N:38◦11′8″ altitude： 1110m Quadrat：3 GPS time12：27
Serial number	Plant name	density	frequency	coverage	height（cm)						Aboveground biomass(g)			Underground biomass(g)			soil temperature	soil moisture
					1	2	3	4	5	averageheight	Envelope weight	Total dry weight	dry weight	Envelope weight	Total dry weight	dry weight			Relative abundance	Relativefrequency	Relativecoverage	Relativeheight	importance value	Pi	Pi^2	D=1-∑Pi^2	lnPi	PilnPi	H=-∑PilnPi	lnS	E=H/lnS	Patrick
1	Chenopodium glaucum	14	4	4	12.3	8.7	3.2	8.9	10.4	8.7	5.46	6.09	0.63	3.47	3.6	0.13	21.1	27.9	0.466667	0.181818	0.0952381	0.0972502	0.210243	0.210243	0.0442022		-1.55949	-0.327872
2	Cynanchum chinense	1		5	56.7	45.3	21.4	19.6	23.2	33.24	5.46	6.65	1.19	5.47	7.07	1.6			0.0333333	0	0.119048	0.371563	0.130986	0.130986	0.0171573		-2.03267	-0.266251
3	Ixeris chinensis	12	17	24	13.4	12.1	10.4	11.7	14.8	12.48	5.44	15.9	10.46	5.51	12	6.49			0.4	0.772727	0.571429	0.139504	0.470915	0.470915	0.221761		-0.753078	-0.354636
4	Potentilla supina	1		5	19.8	20.3	18.7	17.7	21.5	19.6	13.48	16.19	2.71	13.44	13.56	0.12			0.0333333	0	0.119048	0.219092	0.0928683	0.0928683	0.00862453		-2.37657	-0.220708
5	Taraxacum mongolicum	2	1	4	14.6	15.3	11.8	16.6	18.9	15.44	5.44	7.75	2.31	5.46	6.2	0.74			0.0666667	0.0454545	0.0952381	0.172591	0.0949876	0.0949876	0.00902264		-2.35401	-0.223602
6	5	30	22	42						89.46									1	1	1	1	1	1	0.300768	0.699232		-1.39307	1.39307	1.60944	0.865562	5
7
Field vegetation questionnaire
Sample plot No： 34 Ningliubao Survey date： August 21th, 2021
E:106。20′38″ N:38◦11′8″ altitude： 1110m Quadrat：4 GPS time12：27
Serial number	Plant name	density	frequency	coverage	height（cm)						Aboveground biomass(g)			Underground biomass(g)			soil temperature	soil moisture
					1	2	3	4	5	averageheight	Envelope weight	Total dry weight	dry weight	Envelope weight	Total dry weight	dry weight			Relative abundance	Relativefrequency	Relativecoverage	Relativeheight	importance value	Pi	Pi^2	D=1-∑Pi^2	lnPi	PilnPi	H=-∑PilnPi	lnS	E=H/lnS	Patrick
1	Chenopodium glaucum	18	8	35	33.3	23.4	28.5	36.7	35.4	31.46	5.46	27.73	22.27	5.35	5.6	0.25	21.2	29	0.195652	0.5	0.472973	0.396922	0.391387	0.391387	0.153184		-0.938059	-0.367144
2	Amaranthus retroflexus	67	1	24	13.5	12.6	8.9	10.6	8.7	10.86	5.47	12.78	7.31	5.38	6.86	1.48			0.728261	0.0625	0.324324	0.137017	0.313026	0.313026	0.0979851		-1.16147	-0.36357
3	Ixeris chinensis	2	6	2	10.1	12.3	15.6	9.6	16.5	12.82	5.46	5.91	0.45	5.46	5.81	0.35			0.0217391	0.375	0.027027	0.161746	0.146378	0.146378	0.0214265		-1.92156	-0.281275
4	Echinops gmelini	2		8	16.7	15.9	18.4	13.3	19.1	16.68	13.46	15.34	1.88	13.45	14.33	0.88			0.0217391	0	0.108108	0.210447	0.0850735	0.0850735	0.00723749		-2.46424	-0.209641
5	Agropyron cristatum	3	1	5	5.7	6.8	7.4	8.1	9.2	7.44	13.44	13.89	0.45	13.51	13.87	0.36			0.0326087	0.0625	0.0675676	0.0938683	0.0641361	0.0641361	0.00411344		-2.74675	-0.176166
6	5	92	16	74						79.26									1	1	1	1	1	1	0.283946	0.716054		-1.3978	1.3978	1.60944	0.868499	5
7
Field vegetation questionnaire
Sample plot No： 35 Ningliubao Survey date： August 21th, 2021
E:106。20′38″ N:38◦11′8″ altitude： 1110m Quadrat：5 GPS time12：27
Serial number	Plant name	density	frequency	coverage	height（cm)						Aboveground biomass(g)			Underground biomass(g)			soil temperature	soil moisture
					1	2	3	4	5	averageheight	Envelope weight	Total dry weight	dry weight	Envelope weight	Total dry weight	dry weight			Relative abundance	Relativefrequency	Relativecoverage	Relativeheight	importance value	Pi	Pi^2	D=1-∑Pi^2	lnPi	PilnPi	H=-∑PilnPi	lnS	E=H/lnS	Patrick
1	Ixeris chinensis	18	12	25	12.3	17.8	15.6	9.8	12.4	13.58	5.48	22.07	16.59	5.46	9.86	4.4	21.8	29	0.666667	0.857143	0.531915	0.158423	0.553537	0.553537	0.306403		-0.591427	-0.327377
2	Polygonum aviculare	2		4	21.6	22.4	19.5	18.7	20.1	20.46	13.45	17.4	3.95	13.46	13.79	0.33			0.0740741	0	0.0851064	0.238684	0.0994661	0.0994661	0.00989351		-2.30794	-0.229562
3	Calystegia hederacea Wall	4	1	5	25.6	27.9	28.4	21.1	31.6	26.92	13.45	17.05	3.6	13.44	16.64	3.2			0.148148	0.0714286	0.106383	0.314046	0.160001	0.160001	0.0256004		-1.83257	-0.293214
4	Lepidium apetalum	2	1	8	17.9	21.4	18.6	19.3	16.7	18.78	13.41	15.61	2.2	13.45	13.49	0.04			0.0740741	0.0714286	0.170213	0.219085	0.1337	0.1337	0.0178757		-2.01216	-0.269026
5	Artemisia argyi	1		5	5.7	4.9	7.3	5.4	6.6	5.98	13.44	13.69	0.25	13.45	13.56	0.11			0.037037	0	0.106383	0.069762	0.0532955	0.0532955	0.00284041		-2.9319	-0.156257
6	5	27	14	47						85.72									1	1	1	1	1	1	0.362613	0.637387		-1.27544	1.27544	1.60944	0.792473	5
7

## Sheet: Shangqiao Village 40
Field vegetation questionnaire
Sample plot No： 36 Shangqiao Village Survey date： August 21th, 2021
E:106◦ 20′45″ N:38◦ 13′9″ altitude： 1130m Quadrat：1 GPS time21号14：03
Serial number	Plant name	density	frequency	coverage	height（cm)						Aboveground biomass(g)			Underground biomass(g)			soil temperature	soil moisture
					1	2	3	4	5	averageheight	Envelope weight	Total dry weight	dry weight	Envelope weight	Total dry weight	dry weight			Relative abundance	Relativefrequency	Relativecoverage	Relativeheight		importance value	Pi	Pi^2	D=1-∑Pi^2	lnPi	PilnPi	H=-∑PilnPi	lnS	E=H/lnS	Patrick
1	Ixeris chinensis	17	3	11	14.5	15.8	9.8	14.3	13.2	13.52	5.29	10.95	5.66	5.25	7.06	1.81	20.6	14.4	0.566667	0.272727	0.244444	0.0950774		0.294729	0.294729	0.0868651		-1.2217	-0.36007
2	Chenopodium glaucum	5	4	10	19.4	15.3	14.6	12.6	13.5	15.08	7.71	9.48	1.77	5.93	11.06	5.13			0.166667	0.363636	0.222222	0.106048		0.214643	0.214643	0.0460717		-1.53878	-0.330288
3	Setariaviridis	4	3	15	22.6	24.3	26.1	25.7	35.6	26.86	5.4	9.49	4.09	5.35	9.38	4.03			0.133333	0.272727	0.333333	0.188889		0.232071	0.232071	0.0538568		-1.46071	-0.338989
4	Portulaca oleracea	1	1	1	7	8.3	10.2	13.2	15.8	10.9	5.5	11.72	6.22	5.36	5.69	0.33			0.0333333	0.0909091	0.0222222	0.0766526		0.0557793	0.0557793	0.00311133		-2.88635	-0.160999
5	Kochia scoparia	1		5	58.7	62.4	54.3	67.8	54.1	59.46	13.45	14.74	1.29	13.41	13.71	0.3			0.0333333	0	0.111111	0.418143		0.140647	0.140647	0.0197816		-1.9615	-0.275879
6	Amaranthus lividus	2		3	15.6	18.7	19.3	14.1	14.2	16.38	5.31	6.24	0.93	5.36	5.64	0.28			0.0666667	0	0.0666667	0.11519		0.0621308	0.0621308	0.00386024		-2.77851	-0.172631
7	6	30	11	45						142.2									1	1	1	1		1	1	0.213547	0.786453		-1.63886	1.63886	1.79176	0.914663	6
Field vegetation questionnaire
Sample plot No： 37 Shangqiao Village Survey date： August 21th, 2021
E:106◦ 20′45″ N:38◦ 13′9″ altitude： 1130m Quadrat：2
Serial number	Plant name	density	frequency	coverage	height（cm)						Aboveground biomass(g)			Underground biomass(g)			soil temperature	soil moisture
					1	2	3	4	5	averageheight	Envelope weight	Total dry weight	dry weight	Envelope weight	Total dry weight	dry weight			Relative abundance	Relativefrequency	Relativecoverage	Relativeheight		importance value	Pi	Pi^2	D=1-∑Pi^2	lnPi	PilnPi	H=-∑PilnPi	lnS	E=H/lnS	Patrick
1	Ixeris chinensis	6	6	5	8.2	12.1	10.6	11.3	13.4	11.12	5.45	7.02	1.57	5.43	6.25	0.82	20.3	14.1	0.26087	0.375	0.128205	0.132824		0.224225	0.224225	0.0502767		-1.49511	-0.33524
2	Chenopodium glaucum	4	4	6	17.6	18.3	15.3	17.7	30.1	19.8	5.44	11.5	6.06	5.41	17.92	12.51			0.173913	0.25	0.153846	0.236503		0.203565	0.203565	0.0414389		-1.59177	-0.324029
3	Portulaca oleracea	10	6	19	21.3	20.8	26.8	19.4	19.1	21.48	5.51	35.44	29.93	5.57	26.38	20.81			0.434783	0.375	0.487179	0.25657		0.388383	0.388383	0.150841		-0.945764	-0.367318
4	Bassia dasyphylla	1		1	7.8	7.5	7.2	6.9	7.3	7.34	5.54	5.8	0.26	5.45	5.5	0.05			0.0434783	0	0.025641	0.0876732		0.0391981	0.0391981	0.00153649		-3.23913	-0.126968
5	Lappula heteracantha	2		8	21.3	25.6	28.7	20.9	23.4	23.98	5.54	17.64	12.1	5.45	6.93	1.48			0.0869565	0	0.205128	0.286431		0.144629	0.144629	0.0209175		-1.93358	-0.279652
6	5	23	16	39						83.72									1	1	1	1		1	1	0.265011	0.734989		-1.43321	1.43321	1.60944	0.890502	5
Field vegetation questionnaire
Sample plot No： 38 Shangqiao Village Survey date： August 21th, 2021
E:106◦ 20′45″ N:38◦ 13′9″ altitude： 1130m Quadrat：3
Serial number	Plant name	density	frequency	coverage	height（cm)						Aboveground biomass(g)			Underground biomass(g)			soil temperature	soil moisture
					1	2	3	4	5	averageheight	Envelope weight	Total dry weight	dry weight	Envelope weight	Total dry weight	dry weight			Relative abundance	Relativefrequency	Relativecoverage	Relativeheight		importance value	Pi	Pi^2	D=1-∑Pi^2	lnPi	PilnPi	H=-∑PilnPi	lnS	E=H/lnS	Patrick
1	Setariaviridis	1	2	3	34.8	27.6	24.6	22.4	31.3	28.14	5.53	32.69	27.16	5.48	8.83	3.35	20.3	14.1	0.0526316	0.153846	0.166667	0.550039		0.230796	0.230796	0.0532667		-1.46622	-0.338398
2	Chenopodium glaucum	8	8	8	13.2	11.6	5.4	9.3	10.2	9.94	5.38	7.11	1.73	5.38	9.27	3.89			0.421053	0.615385	0.444444	0.194292		0.418794	0.418794	0.175388		-0.870377	-0.364508
3	Portulaca oleracea	6	2	1	5.1	5.2	4.9	7.6	6.8	5.92	5.51	14.11	8.6	5.53	6.83	1.3			0.315789	0.153846	0.0555556	0.115715		0.160227	0.160227	0.0256726		-1.83117	-0.293402
4	Lactucatatarica	4	1	6	7.6	5.4	6.9	8.2	7.7	7.16	5.45	6.02	0.57	5.51	5.97	0.46			0.210526	0.0769231	0.333333	0.139953		0.190184	0.190184	0.0361699		-1.65976	-0.31566
5	4	19	13	18						51.16									1	1	1	1		1	1	0.290497	0.709503		-1.31197	1.31197	1.38629	0.946385	4
6
Field vegetation questionnaire
Sample plot No： 38 Shangqiao Village Survey date： August 21th, 2021
E:106◦ 20′45″ N:38◦ 13′9″ altitude： 1130m Quadrat：4
Serial number	Plant name	density	frequency	coverage	height（cm)						Aboveground biomass(g)			Underground biomass(g)			soil temperature	soil moisture
					1	2	3	4	5	averageheight	Envelope weight	Total dry weight	dry weight	Envelope weight	Total dry weight	dry weight			Relative abundance	Relativefrequency	Relativecoverage	Relativeheight		importance value	Pi	Pi^2	D=1-∑Pi^2	lnPi	PilnPi	H=-∑PilnPi	lnS	E=H/lnS	Patrick
1	Chenopodium glaucum	4	2	3	20	18.9	17.3	20.1	13.2	17.9							20.1	14.1	0.222222	0.142857	0.214286	0.0606349		0.16	0.16	0.0256		-1.83258	-0.293213
2	Cynanchum chinense	3	1	1	21.3	22.4	16.9	21.5	20.7	20.56									0.166667	0.0714286	0.0714286	0.170476		0.12	0.12	0.0144		-2.12026	-0.254432
3	Ixeris chinensis	4	6	3	11.2	15.6	14.6	12.3	15.8	13.9									0.222222	0.428571	0.214286	0.254921		0.28	0.28	0.0784		-1.27297	-0.35643
4	Lactucatatarica	4	4	1	14.5	16.3	11.3	15.7	14.3	14.42									0.222222	0.285714	0.0714286	0.260635		0.21	0.21	0.0441		-1.56065	-0.327736
5	Lappula heteracantha	1		5	21.6	25.4	23.8	25.3	20.9	23.4									0.0555556		0.357143	0.107302		0.13	0.13	0.0169		-2.04022	-0.265229
6	Setariaviridis	2	1	1	12.7	11.4	10.7	10.5	11.6	11.38									0.111111	0.0714286	0.0714286	0.146032		0.1	0.1	0.01		-2.30259	-0.230259
		18	14	14						101.56									1	1	1	1
																									1	0.1894	0.8106		-1.7273	1.7273	1.79176	0.964024	6
Field vegetation questionnaire
Sample plot No： 38 Shangqiao Village Survey date： August 21th, 2021
E:106◦ 20′45″ N:38◦ 13′9″ altitude： 1130m Quadrat：5
Serial number	Plant name	density	frequency	coverage	height（cm)						Aboveground biomass(g)			Underground biomass(g)			soil temperature	soil moisture
					1	2	3	4	5	averageheight	Envelope weight	Total dry weight	dry weight	Envelope weight	Total dry weight	dry weight			Relative abundance	Relativefrequency	Relativecoverage	Relativeheight		importance value	Pi	Pi^2	D=1-∑Pi^2	lnPi	PilnPi	H=-∑PilnPi	lnS	E=H/lnS	Patrick
1	Chenopodium glaucum	3	3	3	6.7	9.3	8.2	9.1	6.3								20.3	14.1	0.25	0.3	0.25	0.04		0.21	0.21	0.0441		-1.56065	-0.327736
2	Ixeris chinensis	4	3	3	6.4	6.8	7.3	7.9	5.7										0.333333	0.3	0.25	0.356667		0.31	0.31	0.0961		-1.17118	-0.363067
3	Lappula heteracantha	1	1	4	22.6	21.8	23.9	25.4	24.9										0.0833333	0.1	0.333333	0.323333		0.21	0.21	0.0441		-1.56065	-0.327736
4	Portulaca oleracea	2	2	1	21.3	20.8	16.7	19.2	18.4										0.166667	0.2	0.0833333	0.07		0.13	0.13	0.0169		-2.04022	-0.265229
5	Bassia dasyphylla	1		1	6.8	7.3	5.1	7.9	6.7										0.0833333		0.0833333	0.153333		0.08	0.08	0.0064		-2.52573	-0.202058
6	Setariaviridis	1	1		13.7	12.6	8.7	10.4	10.6										0.0833333	0.1	0	0.0566667		0.06	0.06	0.0036		-2.81341	-0.168805
		12	10	12															1	1	1	1
																									1	0.2112	0.7888		-1.65463	1.65463	1.79176	0.923467	6

## Sheet: Matrix table
			Chenopodium glaucum	Digitaria sanguinalis	Echinochloa crusgalli	Salsola collina	Echinops gmelini	Lepidium apetalum	Cynanchum chinense	Ixeris chinensis	Lactucatatarica	Lappula heteracantha	Ephedra sinica	Chenopodium album	Portulaca oleracea	Sophora alopecuroides	Potentilla supina	Rumex acetosa	Amaranthus retroflexus	Artemisia scoparia	Rorippa islandica	Calystegia hederacea Wall	Kochia scoparia	Taraxacum mongolicum	Suaeda glauca Bunge	Bassia dasyphylla	Agropyron cristatum	Incarvillea sinensis	Inula salsoloides	Glycyrrhiza uralensis Fisch	Phragmites australis	Setariaviridis	Heteropappus altaicus	Polygonum aviculare	Artemisia argyi	Malva crispa	Plantago asiatica	Solanum nigrum	Amaranthus lividus
			1	2	3	4	5	6	7	8	9	10	11	12	13	14	15	16	17	18	19	20	21	22	23	24	25	26	27	28	29	30	31	32	33	34	35	36	37
Yinhu	A1	1	0.43	0.35	0.06	0.11	0.05	0	0	0	0	0	0	0	0	0	0	0	0	0	0	0	0	0	0	0	0	0	0	0	0	0	0	0	0	0	0	0	0
	A2	2	0.16	0.58	0	0	0	0.06	0.1	0.03	0.06	0	0	0	0	0	0	0	0	0	0	0	0	0	0	0	0	0	0	0	0	0	0	0	0	0	0	0	0
	A3	3	0.28	0.47	0	0	0	0	0	0	0	0.12	0.13	0	0	0	0	0	0	0	0	0	0	0	0	0	0	0	0	0	0	0	0	0	0	0	0	0	0
	A4	4	0	0.64	0	0	0	0	0.08	0	0.06	0	0.1	0.12	0	0	0	0	0	0	0	0	0	0	0	0	0	0	0	0	0	0	0	0	0	0	0	0	0
	A5	5	0.34	0.36	0.07	0	0	0	0	0	0	0.12	0.11	0	0	0	0	0	0	0	0	0	0	0	0	0	0	0	0	0	0	0	0	0	0	0	0	0	0
Xunkun	B1	6	0.18	0.45	0	0	0	0.1	0	0	0	0.07	0	0	0.15	0.06	0	0	0	0	0	0	0	0	0	0	0	0	0	0	0	0	0	0	0	0	0	0	0
	B2	7	0	0.49	0	0	0	0.13	0	0	0	0	0	0	0.12	0	0.11	0.14	0	0	0	0	0	0	0	0	0	0	0	0	0	0	0	0	0	0	0	0	0
	B3	8	0	0.33	0.13	0	0.08	0	0	0	0	0	0	0	0.2	0.11	0.15	0	0	0	0	0	0	0	0	0	0	0	0	0	0	0	0	0	0	0	0	0	0
	B4	9	0.12	0.51	0.11	0	0	0	0	0	0.18	0	0	0	0.08	0	0	0	0	0	0	0	0	0	0	0	0	0	0	0	0	0	0	0	0	0	0	0	0
	B5	10	0.11	0.44	0	0	0	0.11	0	0	0.2	0	0	0	0.14	0	0	0	0	0	0	0	0	0	0	0	0	0	0	0	0	0	0	0	0	0	0	0	0
Daquan Forest plantations	C1	11	0.56	0	0	0	0	0	0	0	0	0	0	0	0.1	0	0	0	0.08	0.06	0.09	0.11	0	0	0	0	0	0	0	0	0	0	0	0	0	0	0	0	0
	C2	12	0	0	0.09	0	0	0.08	0	0	0	0	0	0.5	0	0	0.08	0	0	0	0.08	0	0.17	0	0	0	0	0	0	0	0	0	0	0	0	0	0	0	0
	C3	13	0	0	0.28	0	0	0	0.14	0	0.4	0	0	0	0	0	0	0	0	0	0	0	0	0.14	0.05	0	0	0	0	0	0	0	0	0	0	0	0	0	0
	C4	14	0.51	0	0	0	0	0	0.14	0	0.19	0	0	0	0	0	0	0	0	0	0	0	0	0.08	0.08	0	0	0	0	0	0	0	0	0	0	0	0	0	0
	C5	15	0.13	0	0.18	0	0	0	0	0	0	0	0	0.03	0	0	0	0	0	0	0.26	0.11	0.29	0	0	0	0	0	0	0	0	0	0	0	0	0	0	0	0
Horticultural farm	D1	16	0.3	0	0	0	0	0	0	0.4	0	0	0	0	0	0	0	0	0	0	0	0	0	0	0	0.04	0.12	0.14	0	0	0	0	0	0	0	0	0	0	0
	D2	17	0.52	0	0	0	0	0	0.15	0.19	0	0	0	0	0	0	0	0	0	0	0	0	0	0	0	0	0	0	0.04	0.1	0	0	0	0	0	0	0	0	0
	D3	18	0.44	0	0	0	0	0	0	0.26	0	0	0	0	0	0.08	0	0	0	0	0	0	0	0	0	0	0	0	0	0	0.21	0	0	0	0	0	0	0	0
	D4	19	0.19	0.07	0	0	0	0	0	0.52	0	0	0	0	0	0	0	0	0	0.22	0	0	0	0	0	0	0	0	0	0	0	0	0	0	0	0	0	0	0
	D5	20	0.34	0	0	0	0	0	0	0	0	0	0	0	0	0.07	0	0	0	0	0	0	0	0	0	0	0	0	0	0.11	0	0.32	0.15	0	0	0	0	0	0
Daqin	E1	21	0	0	0	0	0	0	0	0	0	0.13	0	0	0.28	0	0	0	0	0	0.13	0.32	0	0	0	0	0	0	0	0	0	0	0	0.14	0	0	0	0	0
	E2	22	0	0	0	0	0	0.36	0	0	0	0	0	0	0	0	0.15	0	0	0	0	0.39	0	0.1	0	0	0	0	0	0	0	0	0	0	0	0	0	0	0
	E3	23	0	0	0	0	0	0.39	0	0	0.06	0	0	0	0.21	0	0.13	0	0	0	0	0.2	0	0	0	0	0	0	0	0	0	0	0	0	0	0	0	0	0
	E4	24	0	0	0	0	0.12	0.2	0	0	0	0	0	0	0.24	0	0.12	0	0	0	0	0.18	0	0	0	0	0	0	0	0	0.13	0	0	0	0	0	0	0	0
	E5	25	0	0	0	0.06	0	0	0	0	0	0	0	0	0.24	0	0	0.17	0	0	0	0.3	0	0.14	0.09	0	0	0	0	0	0	0	0	0	0	0	0	0	0
Linsenjun	F1	26	0.07	0	0	0	0	0	0	0.52	0	0	0	0	0	0	0	0.13	0.13	0	0	0	0	0.1	0	0	0	0	0	0	0	0	0	0	0.06	0	0	0	0
	F2	27	0	0	0.16	0	0	0	0	0.21	0	0	0	0	0.3	0	0	0	0	0	0	0	0	0	0	0	0.17	0	0	0	0	0.15	0	0	0	0	0	0	0
	F3	28	0	0	0	0	0	0.44	0	0.22	0	0	0	0	0.1	0	0	0	0	0	0	0	0	0	0.14	0	0	0	0	0	0	0	0	0	0	0.09	0	0	0
	F4	29	0.23	0	0	0	0	0.25	0	0	0.27	0	0	0	0	0	0	0	0	0	0	0	0	0	0	0	0	0	0	0	0	0	0	0	0	0	0.12	0.12	0
	F5	30	0	0	0	0	0	0.45	0	0	0	0	0	0	0.29	0	0	0	0	0	0	0	0	0	0	0	0	0	0	0	0	0.09	0	0	0	0.17	0	0	0
Ningliubao	G1	31	0.22	0	0	0	0	0	0	0.29	0	0	0	0	0.23	0	0	0	0.17	0	0.09	0	0	0	0	0	0	0	0	0	0	0	0	0	0	0	0	0	0
	G2	32	0	0	0.15	0	0	0	0.12	0	0.54	0	0	0	0	0	0	0	0	0	0	0.19	0	0	0	0	0	0	0	0	0	0	0	0	0	0	0	0	0
	G3	33	0.21	0	0	0	0	0	0.13	0.47	0	0	0	0	0	0	0.09	0	0	0	0	0	0	0.09	0	0	0	0	0	0	0	0	0	0	0	0	0	0	0
	G4	34	0.39	0	0	0	0.09	0	0	0.15	0	0	0	0	0	0	0	0	0.31	0	0	0	0	0	0	0	0.06	0	0	0	0	0	0	0	0	0	0	0	0
	G5	35	0	0	0	0	0	0.13	0	0.55	0	0	0	0	0	0	0	0	0	0	0	0.16	0	0	0	0	0	0	0	0	0	0	0	0.1	0.05	0	0	0	0
Shangqiao Village	H1	36	0.21	0	0	0	0	0	0	0.29	0	0	0	0	0.06	0	0	0	0	0	0	0	0.14	0	0	0	0	0	0	0	0	0.23	0	0	0	0	0	0	0.06
	H2	37	0.2	0	0	0	0	0	0	0.22	0	0.15	0	0	0.39	0	0	0	0	0	0	0	0	0	0	0.04	0	0	0	0	0	0	0	0	0	0	0	0	0
	H3	38	0.42	0	0	0	0	0	0	0	0.19	0	0	0	0.16	0	0	0	0	0	0	0	0	0	0	0	0	0	0	0	0	0.23	0	0	0	0	0	0	0
	H4	39	0.16	0	0	0	0	0	0.12	0.28	0.21	0.13	0	0	0	0	0	0	0	0	0	0	0	0	0	0	0	0	0	0	0	0.1	0	0	0	0	0	0	0
	H5	40	0.21	0	0	0	0	0	0	0.31	0	0.21	0	0	0.13	0	0	0	0	0	0	0	0	0	0	0.08	0	0	0	0	0	0.06	0	0	0	0	0	0	0

## Sheet: soil factor1
	Treatment	环刀原重量	浸润12h后环刀内湿土重	干沙放置2h后环刀内湿土重	干沙放置24h后环刀内湿土重	48h烘干至恒重	Soil bulk density
1	Y1	103.93	268.23	262.97	246.72	224.18	1.2025
2	Y2	97.79	271.81	257.23	248.14	223.21	1.2542
3	Y3	98.82	255.46	246.64	243.3	213.66	1.1484
4	Y4	104.3	245.96	241.2	239.31	215.91	1.1161
5	Y5	102.39	270.15	261.87	257.77	231.39	1.29
6	X1	102.56	283.86	271.9	267.6	237.15	1.3459
7	X2	104.27	275.53	264.4	262.39	230.64	1.2637
8	X3	98.71	251.24	237.41	234.41	205.24	1.0653
9	X4	104.65	261.98	249.86	246.78	217.03	1.1238
10	X5	102.62	253.03	242.74	239.78	214.4	1.1178
11	DQ1	102.48	237.46	230.59	225.04	189.11	0.8663
12	DQ2	101.78	236.9	231.31	227.42	194.91	0.9313
13	DQ3	103.15	254.08	245.71	242.11	207.06	1.0391
14	DQ4	101.13					1.0226
15	DQ5	100.72					1.0108
16	YY1	101.84	265.12	258.63	256.49	220.25	1.1841
17	YY2	102.83	240.19	235.94	233.72	206.07	1.0324
18	YY3	103.95	269.17	262.72	257.93	226.23	1.2228
19	YY4	104.88	273.57	266.69	265.03	235.98	1.311
20	YY5	100.91	276.26	271.47	268.81	232.01	1.311
21	D1	102.7	265.92	262.73	262.73	227.66	1.2496
22	D2	104.52	267.34	259.97	259.97	222.91	1.1839
23	D3	100.88	283.21	279.54	279.54	239.48	1.386
24	D4	99.05	293.67	289.2	289.2	249.11	1.5006
25	D5	102.05	255.4	250.39	250.39	216.37	1.1432
26	LSJ1	105	254.45	239.44	239.44	205.53	1.0053
27	LSJ2	102.35	270.79	258.96	258.96	222.76	1.2041
28	LSJ3	101.86	265.13	258.99	258.99	225.73	1.2387
29	LSJ4	104.99	266.95	258.1	258.1	224.55	1.1956
30	LSJ5	103.52	262.98	256.92	256.92	225.6	1.2208
31	NLB1	100.49	267.84	253	253	216.6	1.1611
32	NLB2	101.96	252.15	236.84	236.84	205.04	1.0308
33	NLB3	103.56	249.1	229.02	229.02	195.79	0.9223
34	NLB4	101.25	221.7	207.95	207.95	190.8	0.8955
35	NLB5	99.32	230.7	216.69	216.69	186.07	0.8675
36	SQC1	105.88	253.06	247.97	247.97	217.99	1.1211
37	SQC2	100.9	260.86	255.08	255.08	221.51	1.2061
38	SQC3	103.5	273.78	268.05	268.05	238.24	1.3474
39	SQC4	99.45					1.2455
40	SQC5	104.45					1.3014

[truncated: 3 more sheets: soil factor, Sheet1, Sheet2]
